# Supplementary material for: Identification of a key intermediate in the asymmetric Appel process: one pot stereoselective synthesis of P-stereogenic phosphines and phosphine boranes from racemic phosphine oxides
Source: Royal Society of Chemistry journal article supplement (doi:10.1039/c2cc34136k), 2012-01-01
Supplement: c2cc34136k.pdf [file c2cc34136k.pdf]

## Electronic Supporting Information (ESI)

# Independent Generation of Intermediates in the Asymmetric Appel Process leads to a One Pot Stereoselective Synthesis of P-Stereogenic Phosphines and Phosphine Boranes from Racemic Phosphine Oxides

Kamalraj V. Rajendran and Declan G. Gilheany\*

### Contents

|                                                                 |    |
|-----------------------------------------------------------------|----|
| Table of contents.....                                          | 01 |
| General Experimental.....                                       | 02 |
| Experimental Procedure-Phosphine Boranes.....                   | 03 |
| Overview of Mechanistic Hypotheses.....                         | 06 |
| <sup>31</sup> P-NMR Shifts of CPS and DAPS.....                 | 08 |
| NMR Spectra of CPS, DAPS-A, DAPS-B and phosphine borane.....    | 09 |
| HPLC Traces Corresponding to Results in Table 1 Scalemic C..... | 12 |
| HPLC Traces Corresponding to Results in Table 1 Scalemic D..... | 38 |
| References.....                                                 | 51 |

## General Experimental

NMR spectra were recorded at 25 °C on Varian VNMRS 300, 400, and 500 MHz spectrometers.  $^{13}\text{C}$  NMR spectra ( $^{31}\text{P}$  decoupled) were recorded on a VNMRS 600 MHz spectrometer. All NMR samples of potentially air-sensitive compounds were made up under nitrogen in dry  $\text{CDCl}_3$ .  $\text{CDCl}_3$  was purchased from Aldrich, and dried by adding to a Young's flask containing activated molecular sieves (4 Å) under an atmosphere of nitrogen. It was then stored under nitrogen in the Young's flask over the molecular sieves.

High-performance liquid chromatography was performed on an Agilent Technologies 1200 series equipped with a 6 column switching device. HPLC grade solvents were purchased from Aldrich and Lennox Supplies Ireland and used as supplied. All samples were filtered through an Acrodisc CR 13 mm syringe filter with 0.2  $\mu\text{m}$  PTFE prior to injection.

Unless otherwise stated all reactions were carried out under  $\text{N}_2$  atmosphere in dry glassware using Schlenk-line techniques and all glassware was flame dried prior to use. Air and moisture sensitive liquids and solutions were transferred *via* syringe. All commercially available solvents were used as supplied unless otherwise stated. All "dry" solvents were dried and distilled by standard procedures<sup>[1]</sup> or were processed through a Grubbs type still, supplied by Innovative Technology Inc. Pure Solv-400-3-MD solvent purification system. Oxygen free nitrogen was obtained from BOC gases and was used without further drying. Thin layer chromatography (TLC) was performed on Merck pre-coated Kieselgel 60F<sub>254</sub> aluminium plates with realization by UV irradiation. Flash column chromatography was performed on Merck silica 9385, particle size 0.040-0.063 mm. 4Å Molecular sieves were kept stored in an oven at 180 °C at all times. Prior to use sieves were heated to ~300 °C, using a heat gun, for 2 minutes while under vacuum. They were allowed to cool to room temperature and this procedure was then repeated. Oxalyl chloride,  $\text{LiAlH}_4$ ,  $\text{NaBH}_4$ , menthol and other chiral alcohols were purchased from Sigma-Aldrich, Fluka or Merck & Co., Inc.

A number of the required phosphines, and phosphine oxides were synthesised previously by us as follows. Details of these syntheses are given in the file “SI for Reviewer Only”

| Compound                                                  | Reference |
|-----------------------------------------------------------|-----------|
| Methyl(phenyl)- <i>o</i> -tolylphosphine oxide            | [2]       |
| <i>o</i> -Anisyl(methyl)phenylphosphine oxide             | [2]       |
| Methyl(phenyl)-2-trifluoromethylphenylphosphine oxide     | [3]       |
| 2-Biphenyl(methyl)phenylphosphine oxide                   | [3]       |
| Methyl(phenyl)-2- <i>iso</i> -propylphenylphosphine oxide | [2]       |
| 4-Fluoro-2-methylphenyl(methyl)phenylphosphine oxide      | [3]       |

## Experimental Procedure- Phosphine Boranes

### Determination of absolute configurations

The phosphine boranes obtained from the reaction of methyl(phenyl)-*o*-tolylphosphine oxide, methyl(phenyl)-2-*iso*-propylphenylphosphine oxide and *o*-anisyl(methyl)phenylphosphine oxide with oxalyl chloride and (-)-menthol were confirmed to be (*R*)-enantiomer in excess by comparison with reported HPLC data<sup>[4,5]</sup>

### Scalemic Phosphine boranes

#### Optimised Procedure for NaBH<sub>4</sub> Reduction to give methyl(phenyl)-*o*-tolylphosphine borane using (-)-menthol as chiral auxiliary

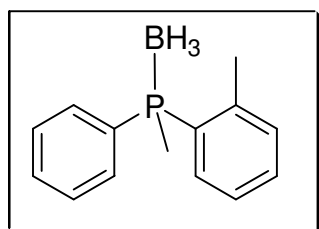

**Methyl(phenyl)-*o*-tolylphosphine borane :** The water contents of the solvent and stock solutions were determined by Karl Fischer titration to be less than 5 ppm. A standard solution of methylphenyl(*o*-tolyl)phosphine oxide (0.110 M) was prepared in anhydrous THF in a sealed vessel under nitrogen. Standard solutions of (-)-menthol (0.132

M) and oxalyl chloride (0.110 M) were prepared in a similar manner. Oxalyl chloride solution (10.0 mL, 1.1 mmol) was added dropwise at room temperature to the phosphine oxide solution

(10.0 mL, 1.1 mmol) in a flame-dried degassed Schlenk tube. Analysis by  $^{31}\text{P}$  NMR showed the formation of the chlorophosphonium salt at 71.0 ppm. Following addition of alcohol solution (10.0 mL, 1.32 mmol) at  $-78\text{ }^{\circ}\text{C}$ , the formation of the diastereomeric alkoxyphosphonium salts was confirmed by  $^{31}\text{P}$  NMR ( $\delta = 67.8$  and  $67.3$  ppm).

### Sampling DAPS (diastereomeric alkoxyphosphonium salts) for $^{31}\text{P}$ -NMR

When all the menthol had been added, the reaction was stirred at  $-78\text{ }^{\circ}\text{C}$  for 5 minutes. After this time a 3 mL sample of reaction mixture was syringed from the reaction mixture into a separate flame dried degassed Schlenk tube. Solvent was completely removed under vacuum at room temperature and the residue was dissolved in dry  $\text{CDCl}_3$  (0.7 mL), this was then syringed into a NMR tube contained in a long Schlenk tube that was charged with an atmosphere of nitrogen. The % de was measured by  $^{31}\text{P}$  NMR with 128 scans and 3 second relaxation delay.

$\text{NaBH}_4$  solution (11.0 mL, 0.5 M in diglyme, 5.5 mmol) was added dropwise at  $-78\text{ }^{\circ}\text{C}$ , the vessel removed from the cooling bath and allowed to warm to room temperature. The reaction was stirred for a further 60 min, at which point the diastereomeric salts were shown by  $^{31}\text{P}$  NMR to have been consumed and the phosphine borane formed (peak at  $\delta$  10.2 ppm). The reaction mixture was concentrated under reduced pressure and the residue diluted with ethyl acetate (100 mL) and water added (100 mL). The organic layer was separated and the aqueous layer extracted with ethyl acetate (50 mL). The combined extracts were dried over  $\text{MgSO}_4$  and concentrated under reduced pressure. The crude product was purified by column chromatography on silica gel (ethyl acetate: cyclohexane 1:1) yielding the phosphine borane as a colourless oil (0.22 g, 87%). CSP-HPLC analysis revealed it to have 76% ee.

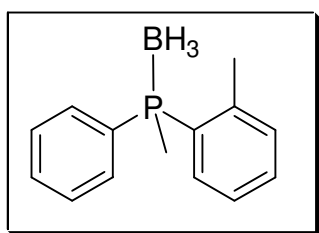

$^1\text{H}$  NMR ( $\text{CDCl}_3$ , 300 MHz):  $\delta = 7.72\text{--}7.14$  (m, 9H, Ar), 2.17 (s, 3H,  $\text{ArCH}_3$ ), 1.82 (d,  $^2J_{\text{PH}} = 9.8$  Hz, 3H,  $\text{PCH}_3$ ) 1.61–0.72 (brm, 3H,  $\text{BH}_3$ ) ppm.  $^{31}\text{P}$  NMR ( $\text{CDCl}_3$ , 121 MHz):  $\delta = 10.2$  (lit<sup>[4]</sup> 10.9) ppm. HPLC (CHIRALPAK<sup>®</sup> AS-H column, 98:2 heptane:EtOH, 1 mL/min)  $R_t$ : 9.3 min(*R*), 11.2 min(*S*).



## Optimised Procedure for LiAlH<sub>4</sub> Reduction to give methyl(phenyl)-*o*-tolylphosphine using (-)-menthol as chiral auxiliary

DAPS was generated as described in the above procedure and their presence was confirmed by <sup>31</sup>P NMR. To the mixture was added LiAlH<sub>4</sub> solution (10.0 mL, 0.11M in toluene, 1.1 mmol.) was added dropwise at -78 °C, the vessel removed from the cooling bath and allowed to warm to room temperature. The reaction was stirred for a further 60 min., at which point the diastereomeric salts were shown by <sup>31</sup>P NMR to have undergone full conversion to phosphine (δ -36.2 ppm). BH<sub>3</sub>-THF complex (0.65 mL, 2.0 M solution in THF, 1.2 equiv) was added and <sup>31</sup>P NMR of the clear solution revealed one peak at δ 10.2 ppm (phosphine borane). The reaction mixture was concentrated under reduced pressure, the residue diluted with ethyl acetate (100 mL) and water added (100 mL). The organic layer was separated and the aqueous layer extracted with ethyl acetate (50 mL). The combined extracts were dried over MgSO<sub>4</sub> and concentrated under reduced pressure. The crude product was purified by column chromatography on silica gel (ethyl acetate:hexane 1:1) yielding the phosphine borane as a colourless oil (0.23 g, 91%). CSP HPLC analysis revealed it to have 78% ee.

Similar procedures were followed to generate other scalemic phosphine boranes by both methods

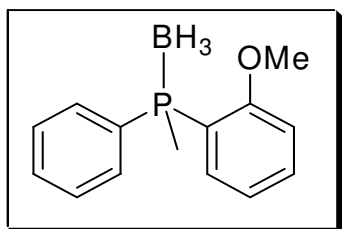

***o*-Anisyl(methyl)phenylphosphine borane :** (0.22 g, 91%, 40% ee)

<sup>1</sup>H NMR (CDCl<sub>3</sub>, 300 MHz): δ = 7.90–6.77 (m, 9H, Ar), 3.68 (s, 3H, Ar-OCH<sub>3</sub>), 1.94 (d, <sup>2</sup>J<sub>PH</sub> = 10.2 Hz, 3H, PCH<sub>3</sub>) 1.43–0.50 (brm, 3H, BH<sub>3</sub>) ppm. <sup>31</sup>P NMR (CDCl<sub>3</sub>, 121 MHz): δ = 8.4 (lit.<sup>[5]</sup> 9.2) ppm.

HPLC (CHIRALPAK<sup>®</sup> AS-H column, 98:2 heptane:EtOH, 1

mL/min) R<sub>t</sub>: 12.3 min(*R*), 13.1 min(*S*).

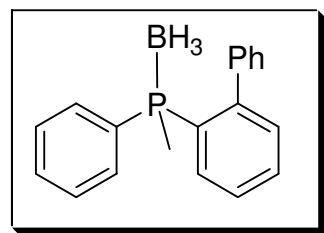

**2-Biphenyl(methyl)phenylphosphine borane :** (0.26 g, 89%, 51% ee)

<sup>1</sup>H NMR (CDCl<sub>3</sub>, 300 MHz): δ = 7.89–7.82 (m, 5H, Ar), 7.70–7.19 (m, 9H, Ar), 1.41 (d, <sup>2</sup>J<sub>PH</sub> = 10.1 Hz, 3H, PCH<sub>3</sub>), 1.56–0.73 (brm, 3H, BH<sub>3</sub>) ppm. <sup>31</sup>P NMR (CDCl<sub>3</sub>, 121 MHz): δ = 13.3 (lit.<sup>[6]</sup> 14.4) ppm.

HPLC (CHIRALPAK<sup>®</sup> AS-H column, 98:2 heptane:EtOH, 1 mL/min)

R<sub>t</sub>: 8.7 min(*R*), 10.0 min(*S*).

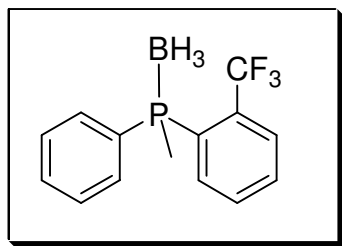

**Methyl(phenyl)-2-trifluoromethylphenylphosphine borane** (0.26 g, 92%, 71 % ee)  $^1\text{H}$  NMR ( $\text{CDCl}_3$ , 300 MHz):  $\delta$  = 7.70-7.02 (m, 9H, Ar), 1.91 (d,  $^2J_{\text{PH}}$  = 9.9 Hz, 3H,  $\text{PCH}_3$ ), 0.65-1.53 (brm, 3H,  $\text{BH}_3$ ) ppm.  $^{31}\text{P}$  NMR ( $\text{CDCl}_3$ , 121 MHz):  $\delta$  = 18.3 (lit.<sup>[7]</sup> 18.7) ppm. HPLC (CHIRALPAK<sup>®</sup> AS-H column, 98:2 heptane:EtOH, 1 mL/min)  $R_t$ : 8.0 min(*R*), 9.0 min(*S*).

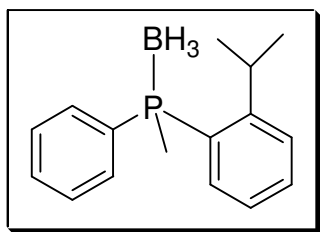

**Methyl(phenyl)-2-iso-propylphenylphosphine borane:** (0.24 g, 92%, 41% ee)  $^1\text{H}$  NMR ( $\text{CDCl}_3$ , 300 MHz):  $\delta$  = 7.67-7.26 (m, 9H, Ar) 3.18 (m 1H, CH), 1.86 (d,  $^2J_{\text{PH}}$  = 10.0 Hz, 3H,  $\text{PCH}_3$ ), 1.08 (d,  $^3J_{\text{HH}}$  = 6.8 Hz, 3H,  $\text{CHCH}_3$ ), 0.73 (d,  $^3J_{\text{HH}}$  = 7.4 Hz, 3H,  $\text{CHCH}_3$ ); 1.62–0.51 (brm, 3H,  $\text{BH}_3$ ) ppm.  $^{31}\text{P}$  NMR ( $\text{CDCl}_3$ , 300 MHz) :  $\delta$  = 9.0 (lit.<sup>[4]</sup> 9.7) ppm. HPLC (CHIRALPAK<sup>®</sup> AS-H column, 98:2 heptane:EtOH, 1 mL/min)  $R_t$ : 6.7 min(*R*), 8.2 min(*S*).

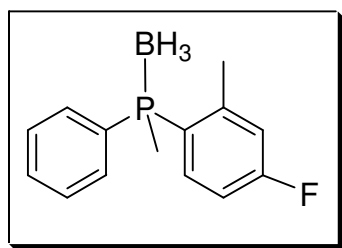

**4-Fluoro-2-methylphenyl(methyl)phenylphosphine borane:** (0.22 g, 84%, 58% ee)  $^1\text{H}$  NMR ( $\text{CDCl}_3$ , 300 MHz):  $\delta$  = 7.74-6.89 (m, 8H, Ar), 2.18 (s, 3H,  $\text{ArCH}_3$ ), 1.84 (d,  $^2J_{\text{PH}}$  = 9.9 Hz, 3H,  $\text{CH}_3$ ), 0.90-1.57 (brm, 3H,  $\text{BH}_3$ ) ppm.  $^{31}\text{P}$  NMR ( $\text{CDCl}_3$ , 121 MHz):  $\delta$  = 10.2 ppm. HPLC (CHIRALPAK<sup>®</sup> AS-H column, 98:2 heptane:EtOH, 1 mL/min)  $R_t$ : 9.0 min(*R*), 11.0 min(*S*).

## Overview of Mechanistic Hypotheses

Plausible mechanisms for the three stages of the reaction are shown in Figure 1. In the first instance it is postulated that the phosphine oxide **a** reacts with oxalyl chloride to form a transient species **b** which collapses to give **CPS** with the release of CO and  $\text{CO}_2$ . In the second stage of the reaction, species reacts with menthol to give *unequal* amounts of a pair of diastereomeric alkoxyphosphonium salts (**DAPS**). This could be by direct reaction (route B) or could go *via* the pentaco-ordinate species diastereomeric chloroalkoxy phosphoranes **d** (route A). The latter would also presumably exist as an unequal pair of diastereomers, rapidly interconverting by Berry pseudorotation. In the third stage of the reaction, borohydride attack on **DAPS** releases the alcohol, forming a H-phosphonium salt. Hydride attack on this salt by another molecule of

borohydride gives phosphine with release of hydrogen gas. Boronation of the phosphine occurs *in situ* utilizing  $\text{BH}_3$  resulting from hydrogen transfer from borohydride.

### Stage 1- Reduction

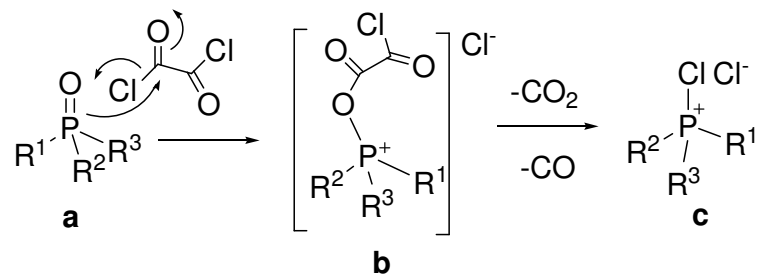

### Stage 2- Dynamic Kinetic Resolution (DKR)

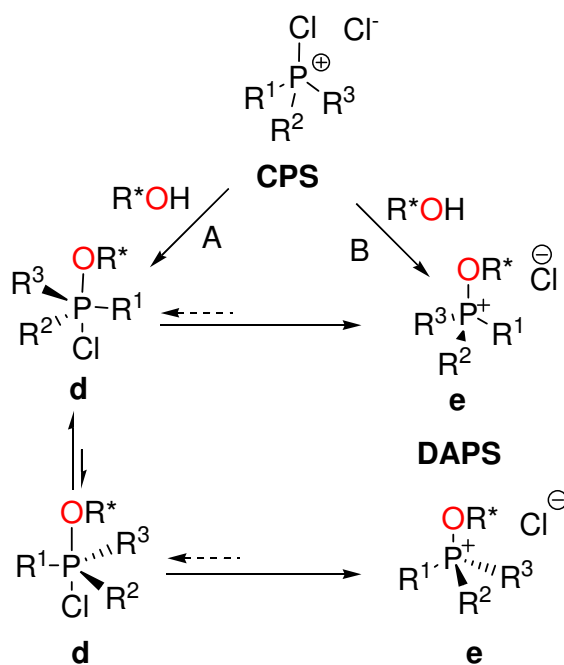

### Stage 3- Hydride Reduction

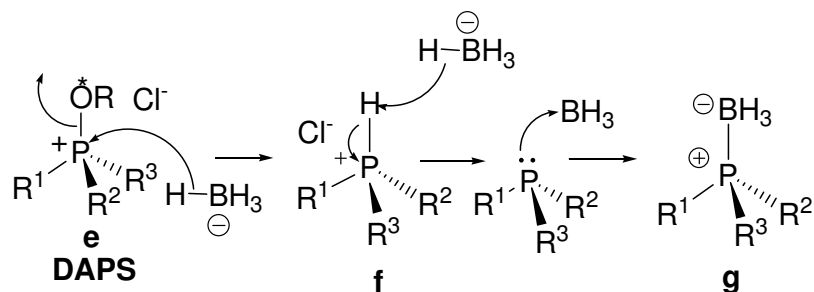

**Figure 1.** Proposed working reaction mechanism.

## List of <sup>31</sup>P-NMR Shifts of CPS and DAPS

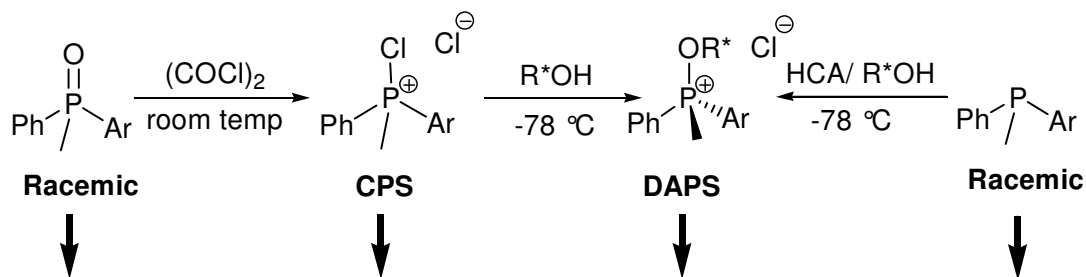

| Entry | Starting material | CPS <sup>a</sup> (ppm) | DAPS <sup>b</sup> (ppm)<br>R*OH = (-)-menthol | Starting material |
|-------|-------------------|------------------------|-----------------------------------------------|-------------------|
| 1     |                   | 71.0                   | Major: 67.3<br>Minor: 67.8                    |                   |
| 2     |                   | 70.5                   | Major: 66.8<br>Minor: 66.6                    |                   |
| 2     |                   | 67.1                   | Major: 66.7<br>Minor: 66.3                    |                   |
| 3     |                   | 70.8                   | Major: 67.2<br>Minor: 67.6                    |                   |
| 4     |                   | 66.8                   | Major: 69.6<br>Minor: 69.2                    |                   |
| 5     |                   | 70.4                   | Major: 67.2<br>Minor: 67.8                    |                   |

<sup>a</sup>: CPS: <sup>31</sup>P NMR shift assigned as chlorophosphonium salt;

<sup>b</sup>: DAPS: <sup>31</sup>P NMR shift assigned as diastereomeric alkoxyphosphonium salts prepared by both the routes

**Exemplar NMR spectra of chlorophosphonium salt (CPS), diastereomeric alkoxyphosphonium salts (DAPS-A), (DAPS-B) and phosphine borane (from reaction of methyl(phenyl)-*o*-tolylphosphine oxide)**

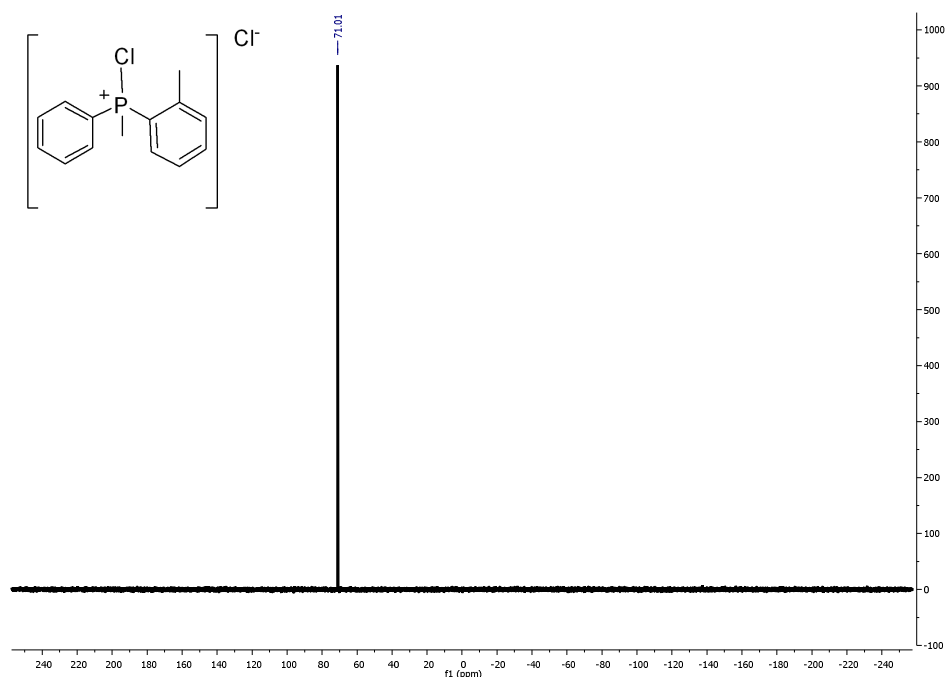

**<sup>31</sup>P-NMR of chlorophosphonium salt (CPS)**

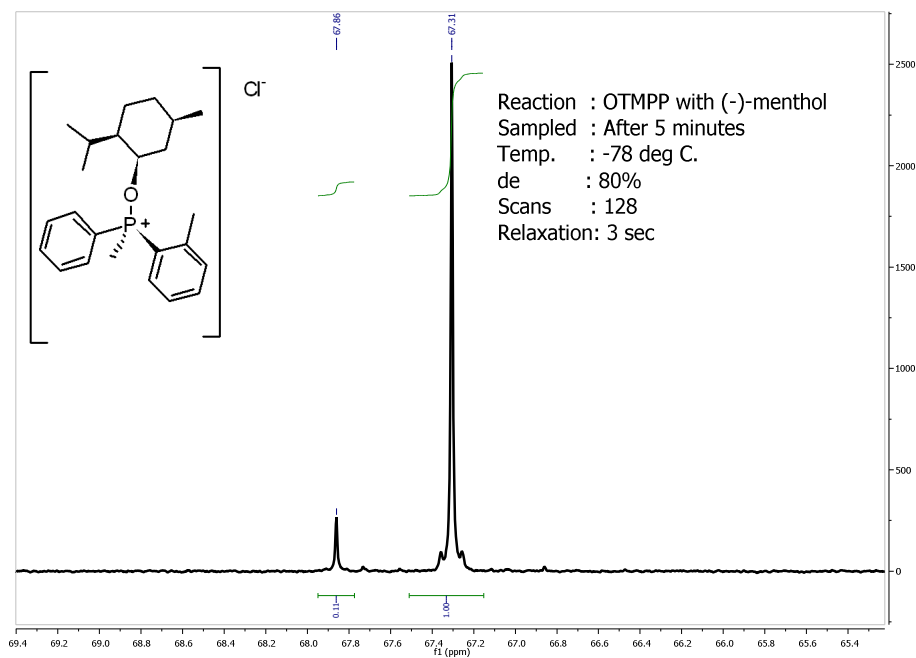

**<sup>31</sup>P-NMR diastereomeric alkoxyphosphonium salts (DAPS-A)**

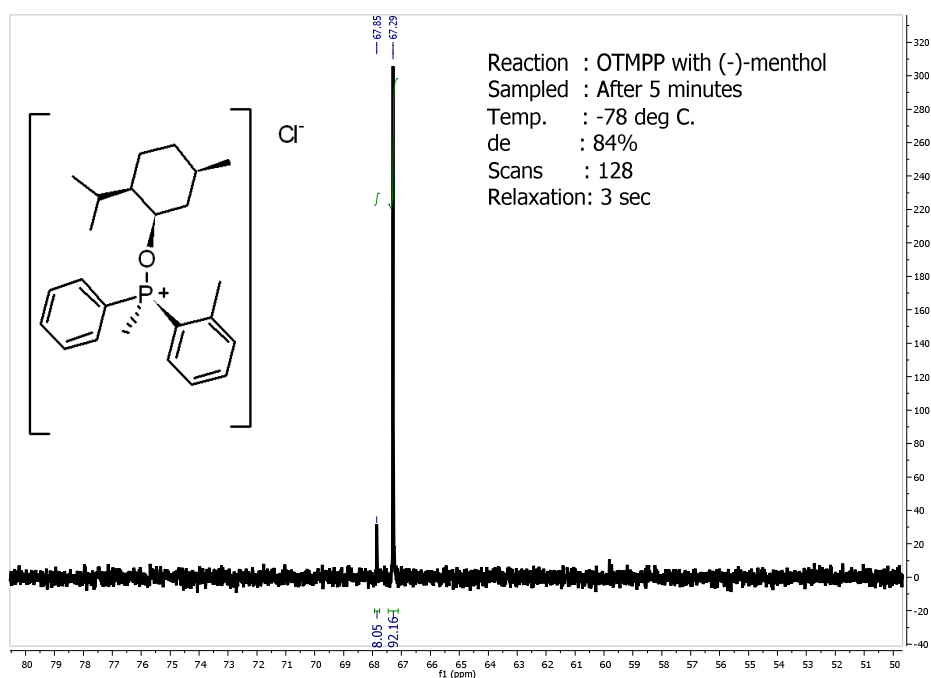

## <sup>31</sup>P-NMR diastereomeric alkoxyphosphonium salts (DAPS-B)

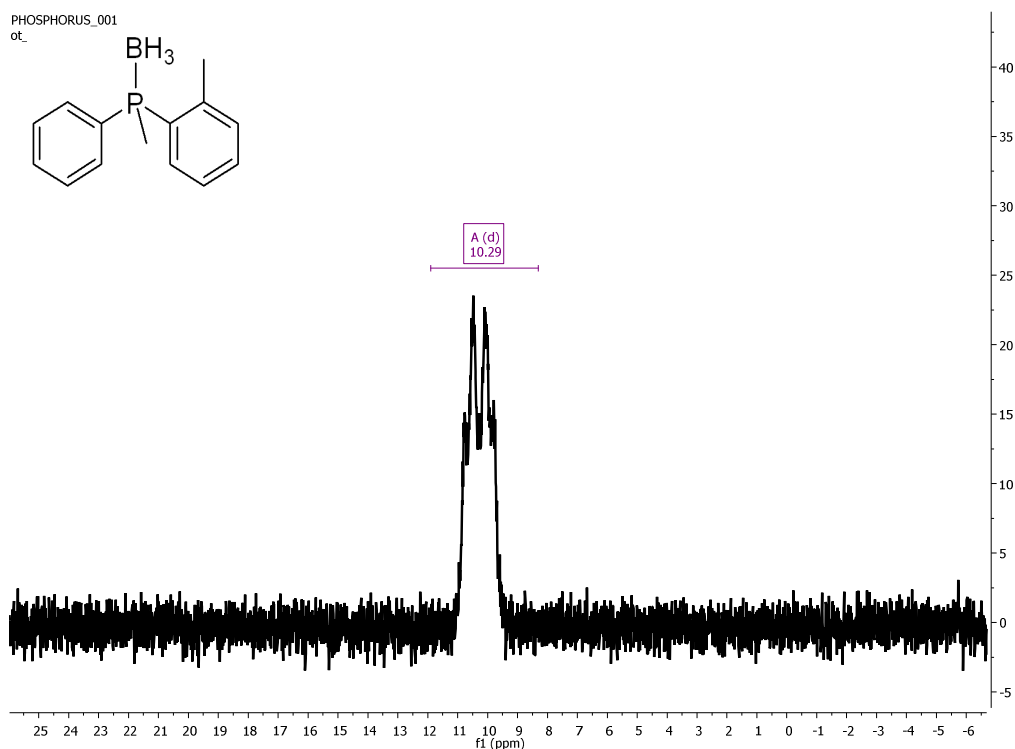

## <sup>31</sup>P-NMR of phosphine borane

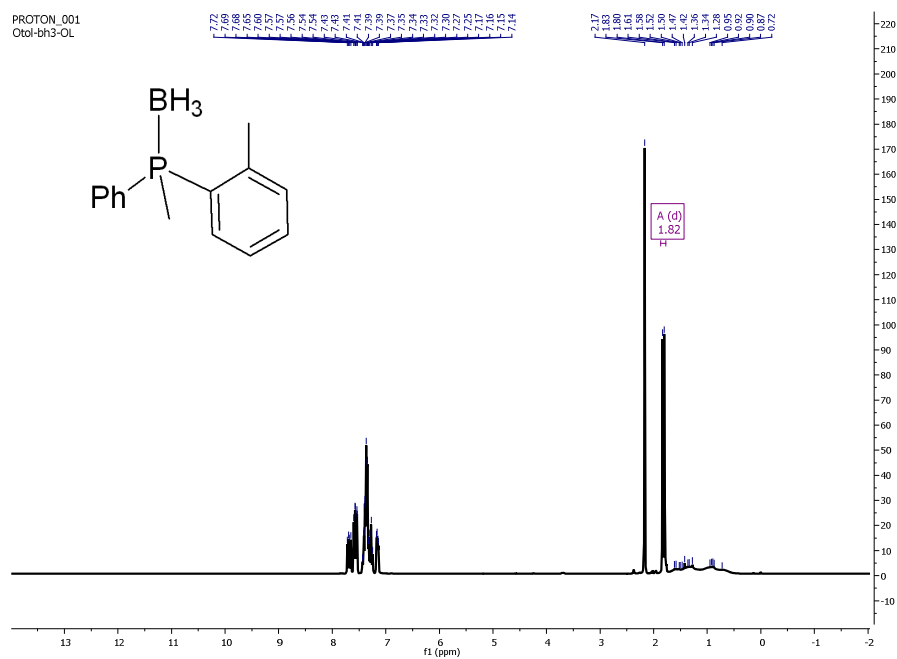

**<sup>1</sup>H-NMR of phosphine borane**

## Supporting HPLC Traces Corresponding to Results in Table 1 Scalemic C

|                      |             |
|----------------------|-------------|
| <b>Entry 1.....</b>  | <b>p.14</b> |
| <b>Entry 2.....</b>  | <b>p.15</b> |
| <b>Entry 3.....</b>  | <b>p.16</b> |
| <b>Entry 4.....</b>  | <b>p.17</b> |
| <b>Entry 5.....</b>  | <b>p.18</b> |
| <b>Entry 6.....</b>  | <b>p.20</b> |
| <b>Entry 7.....</b>  | <b>p.21</b> |
| <b>Entry 8.....</b>  | <b>p.22</b> |
| <b>Entry 9.....</b>  | <b>p.23</b> |
| <b>Entry 10.....</b> | <b>p.24</b> |
| <b>Entry 11.....</b> | <b>p.26</b> |
| <b>Entry 12.....</b> | <b>p.27</b> |
| <b>Entry 13.....</b> | <b>p.28</b> |
| <b>Entry 14.....</b> | <b>p.29</b> |
| <b>Entry 15.....</b> | <b>p.31</b> |
| <b>Entry 16.....</b> | <b>p.32</b> |
| <b>Entry 17.....</b> | <b>p.34</b> |
| <b>Entry 18.....</b> | <b>p.35</b> |
| <b>Entry 19.....</b> | <b>p.37</b> |



# Racemic

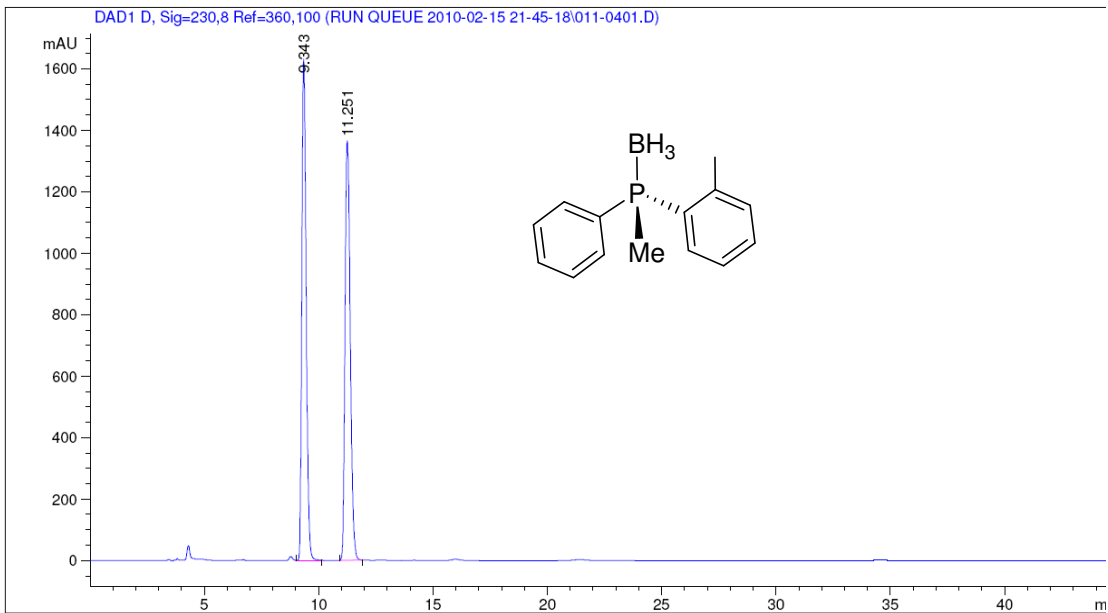

=====  
Area Percent Report  
=====

Sorted By : Signal  
Multiplier : 1.0000  
Dilution : 1.0000  
Use Multiplier & Dilution Factor with ISTDs

Signal 1: DAD1 D, Sig=230,8 Ref=360,100

| Peak # | RetTime [min] | Type | Width [min] | Area [mAU*s] | Height [mAU] | Area %  |
|--------|---------------|------|-------------|--------------|--------------|---------|
| 1      | 9.343         | VB   | 0.2055      | 2.14471e4    | 1630.19421   | 49.8742 |
| 2      | 11.251        | BB   | 0.2462      | 2.15553e4    | 1365.22644   | 50.1258 |



# Entry 2

## Enantioenriched using (+)-menthol

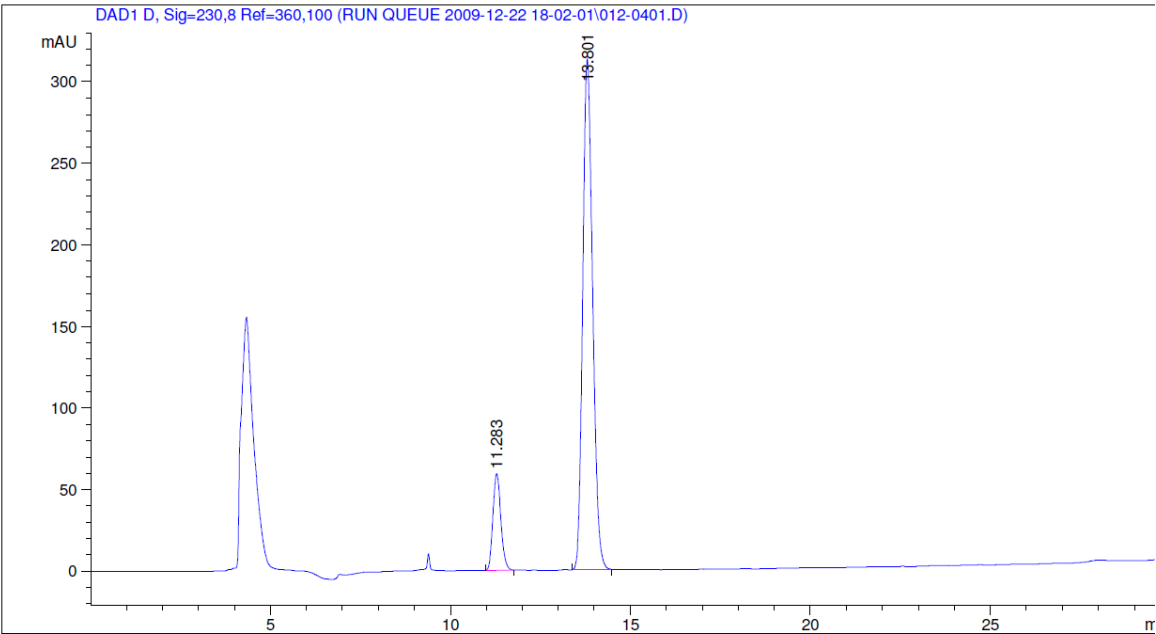

=====  
Area Percent Report  
=====

Sorted By : Signal  
Multiplier : 1.0000  
Dilution : 1.0000  
Use Multiplier & Dilution Factor with ISTDs

Signal 1: DAD1 D, Sig=230,8 Ref=360,100

| Peak # | RetTime [min] | Type | Width [min] | Area [mAU*s] | Height [mAU] | Area %  |
|--------|---------------|------|-------------|--------------|--------------|---------|
| 1      | 11.283        | BB   | 0.2371      | 911.22461    | 59.36821     | 13.2247 |
| 2      | 13.801        | BB   | 0.2966      | 5979.10449   | 313.36383    | 86.7753 |





# Entry 5

## Enantioenriched using (*R*)-BINOL

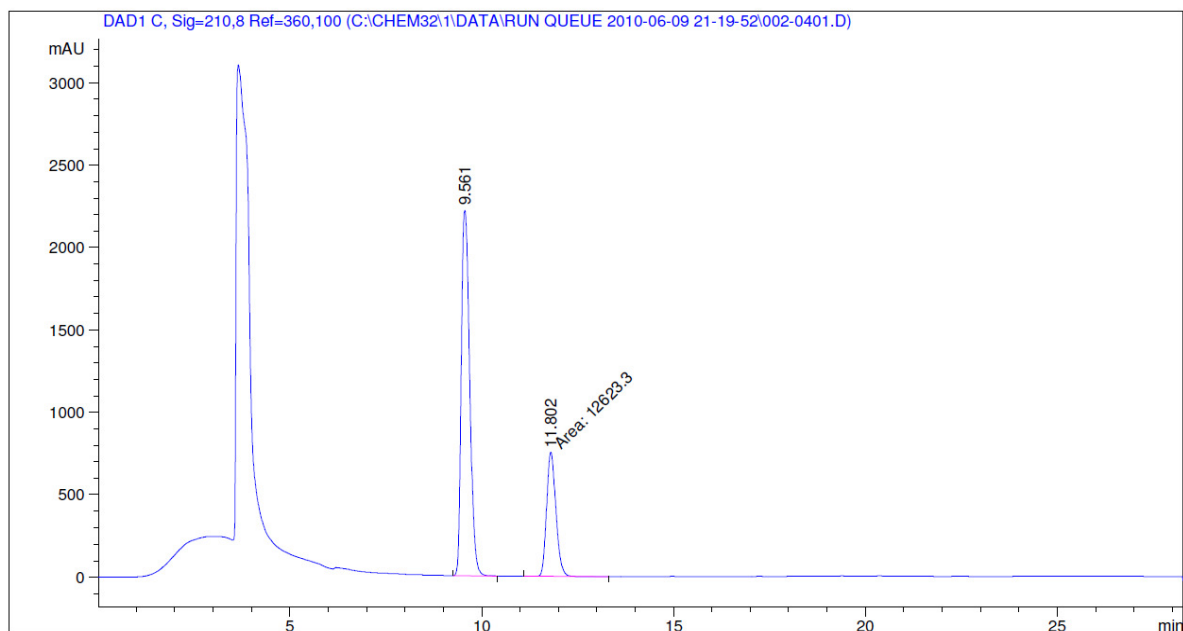

### Area Percent Report

Sorted By : Signal  
Multiplier : 1.0000  
Dilution : 1.0000  
Use Multiplier & Dilution Factor with ISTDs

Signal 1: DAD1 C, Sig=210,8 Ref=360,100

| Peak # | RetTime [min] | Type | Width [min] | Area [mAU*s] | Height [mAU] | Area %  |
|--------|---------------|------|-------------|--------------|--------------|---------|
| 1      | 9.561         | BB   | 0.2409      | 3.36242e4    | 2217.39478   | 72.7049 |
| 2      | 11.802        | MM   | 0.2792      | 1.26233e4    | 753.55151    | 27.2951 |

**Ar = *o*-anisyl**

**Racemic**

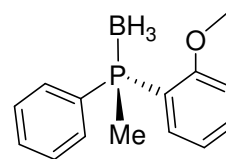

```
=====
Acq. Operator   : General sequence          Seq. Line :    3
Acq. Instrument : Kev HPLC 1                Location  : Vial 11
Injection Date  : 6/29/2010 10:17:16 PM      Inj       :    1
                                           Inj Volume: 5 µl
Acq. Method     : C:\Chem32\1\DATA\RUN QUEUE 2010-06-29 21-42-34\ISO_98_02_30MIN_1MLMIN.M
Last changed    : 6/29/2010 10:17:05 PM by General sequence
Analysis Method : C:\CHEM32\1\METHODS\01_COLUMN METHODS\STABILISE_98_02_10MIN_1MLMIN.M
Last changed    : 6/29/2010 9:32:43 PM by General sequence
Method Info     : Stabilise column at 99/1 heptane/EtOH for 10min at 1ml/min
=====
```

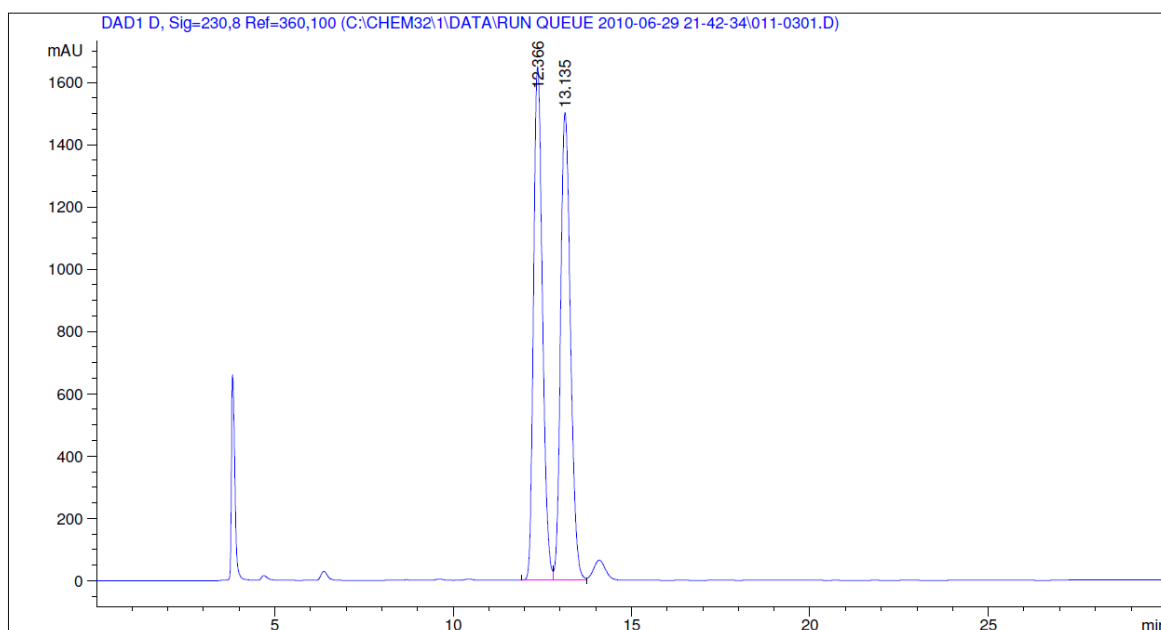

Area Percent Report

```
=====
Sorted By      : Signal
Multiplier     : 1.0000
Dilution      : 1.0000
Use Multiplier & Dilution Factor with ISTDs
=====
```

Signal 1: DAD1 D, Sig=230,8 Ref=360,100

| Peak # | RetTime [min] | Type | Width [min] | Area [mAU*s] | Height [mAU] | Area %  |
|--------|---------------|------|-------------|--------------|--------------|---------|
| 1      | 12.366        | BV   | 0.2707      | 2.86744e4    | 1650.24219   | 49.7663 |
| 2      | 13.135        | VV   | 0.3028      | 2.89437e4    | 1502.02356   | 50.2337 |

# Entry 6

## Enantioenriched using (-)-menthol (NaBH<sub>4</sub> as reductant)

```
=====
Acq. Operator   : General sequence                      Seq. Line :    5
Acq. Instrument : Kev HPLC 1                            Location  : Vial 3
Injection Date  : 6/10/2010 9:59:23 PM                  Inj       :    1
                                                    Inj Volume: 5 µl

Acq. Method     : C:\Chem32\1\DATA\RUN QUEUE 2010-06-10 20-03-57\ISO_98_02_45MIN_1MLMIN.M
Last changed    : 6/10/2010 9:59:13 PM by General sequence
                  (modified after loading)
Analysis Method : C:\CHEM32\1\METHODS\03_QUICKSTART 1 MLMIN METHODS\ISO_98_02_30MIN_1MLMIN.M
Last changed    : 5/20/2010 11:50:38 AM by General sequence
Method Info     : Isocratic at 98/02 heptane/EtOH for 30min at 1ml/min
=====
```

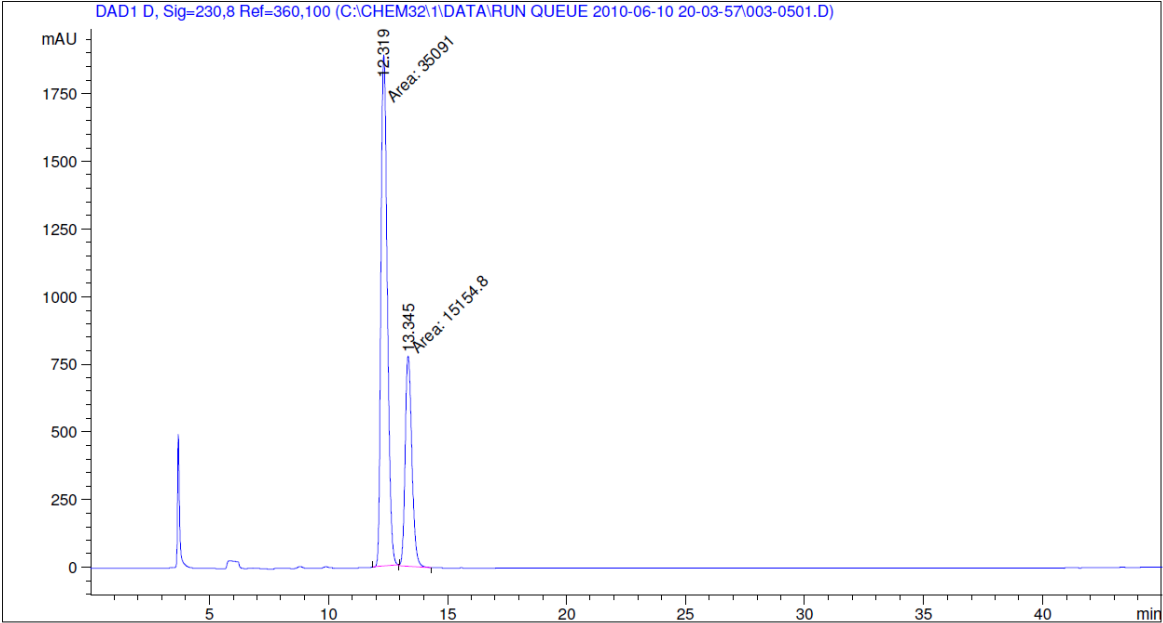

```
=====
                          Area Percent Report
=====

Sorted By      :      Signal
Multiplier     :      1.0000
Dilution       :      1.0000
Use Multiplier & Dilution Factor with ISTDs
=====
```

Signal 1: DAD1 D, Sig=230,8 Ref=360,100

| Peak # | RetTime [min] | Type | Width [min] | Area [mAU*s] | Height [mAU] | Area %  |
|--------|---------------|------|-------------|--------------|--------------|---------|
| 1      | 12.319        | MM   | 0.3099      | 3.50910e4    | 1887.43652   | 69.8386 |
| 2      | 13.345        | MM   | 0.3255      | 1.51548e4    | 776.07684    | 30.1614 |



# Entry 7

## Enantioenriched using (+)-menthol (NaBH<sub>4</sub> as reductant)

```
=====
Acq. Operator   : General sequence          Seq. Line :    7
Acq. Instrument : Kev HPLC 1                Location  : Vial 93
Injection Date  : 7/1/2010 11:28:03 PM      Inj       :    1
                                           Inj Volume: 5 µl

Acq. Method     : C:\Chem32\1\DATA\RUN QUEUE 2010-07-01 21-00-43\ISO_98_02_30MIN_1MLMIN.M
Last changed    : 7/1/2010 11:27:51 PM by General sequence
                  (modified after loading)
Analysis Method : C:\CHEM32\1\METHODS\01_COLUMN METHODS\STABILISE_98_02_10MIN_1MLMIN.M
Last changed    : 6/29/2010 9:32:43 PM by General sequence
Method Info     : Stabilise column at 99/1 heptane/EtOH for 10min at 1ml/min
=====
```

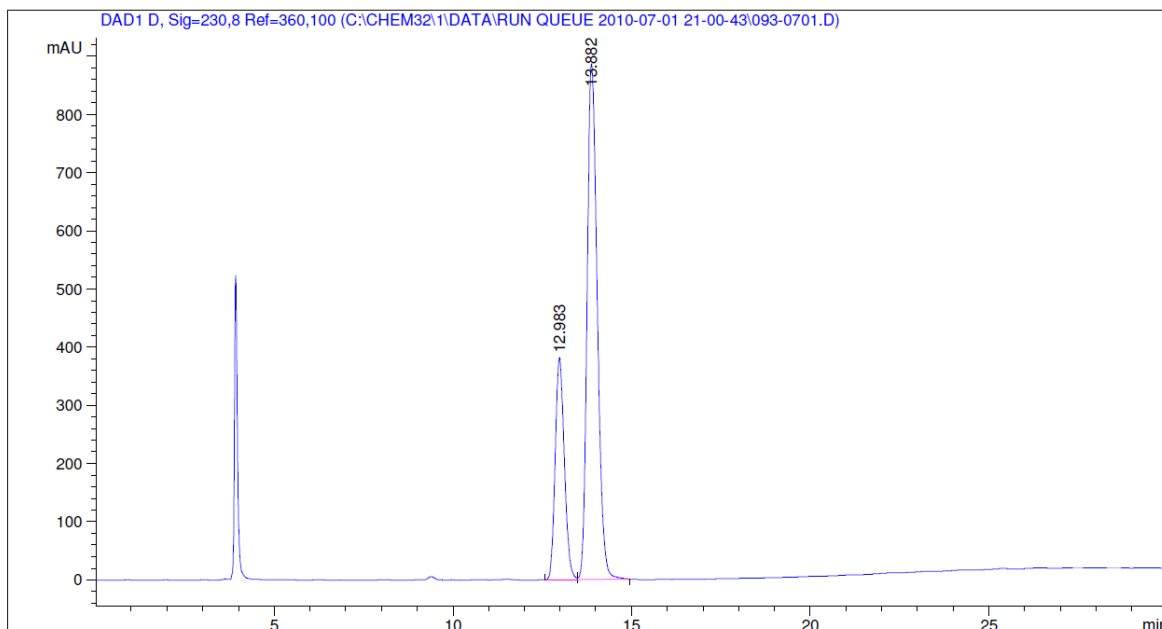

### Area Percent Report

```
=====
Sorted By      :      Signal
Multiplier     :      1.0000
Dilution       :      1.0000
Use Multiplier & Dilution Factor with ISTDs
=====
```

Signal 1: DAD1 D, Sig=230,8 Ref=360,100

| Peak # | RetTime [min] | Type | Width [min] | Area [mAU*s] | Height [mAU] | Area %  |
|--------|---------------|------|-------------|--------------|--------------|---------|
| 1      | 12.983        | BV   | 0.2755      | 6796.08691   | 382.17450    | 27.9796 |
| 2      | 13.882        | VB   | 0.3083      | 1.74933e4    | 886.18372    | 72.0204 |

# Entry 8

## Enantioenriched using (-)-8-phenylmenthol (NaBH<sub>4</sub> as reductant)

```
=====
Acq. Operator   : General sequence                      Seq. Line :    4
Acq. Instrument : Kev HPLC 1                          Location  : Vial 2
Injection Date  : 6/11/2010 4:17:25 PM                 Inj       :    1
                                                    Inj Volume: 5 µl

Acq. Method     : C:\Chem32\1\DATA\RUN QUEUE 2010-06-11 15-02-53\ISO_98_02_45MIN_1MLMIN.M
Last changed    : 6/11/2010 4:17:15 PM by General sequence
                  (modified after loading)

Analysis Method : C:\CHEM32\1\METHODS\03_QUICKSTART 1 MLMIN METHODS\ISO_98_02_30MIN_1MLMIN.M
Last changed    : 5/20/2010 11:50:38 AM by General sequence
Method Info     : Isocratic at 98/02 heptane/EtOH for 30min at 1ml/min
=====
```

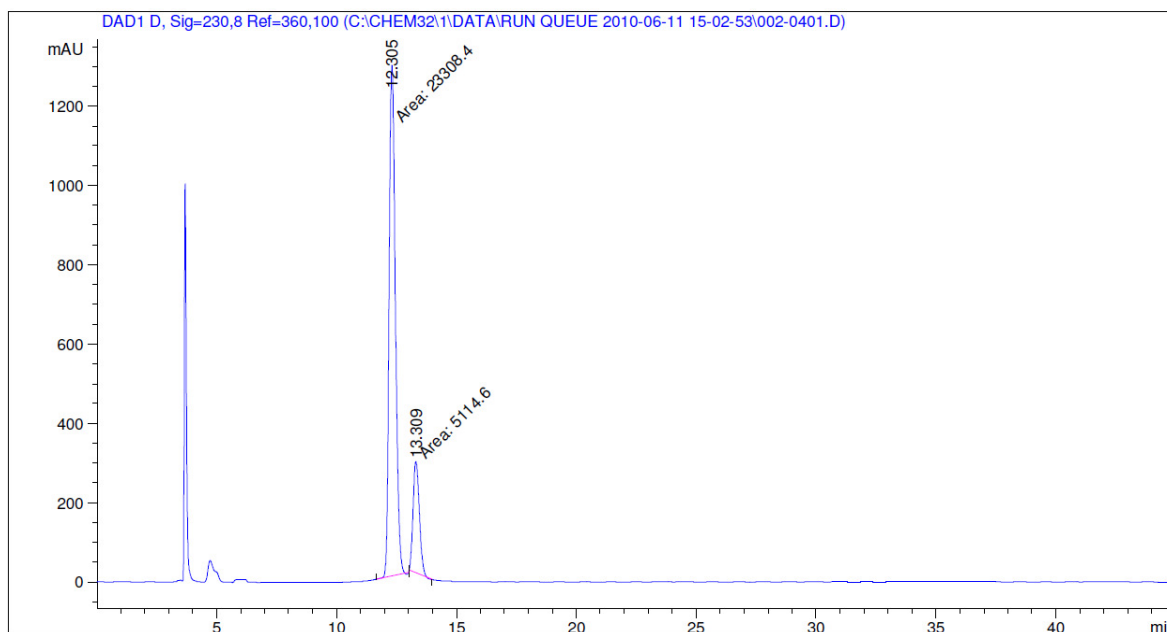

### Area Percent Report

```
=====
Sorted By      :      Signal
Multiplier     :      1.0000
Dilution       :      1.0000
Use Multiplier & Dilution Factor with ISTDs
=====
```

Signal 1: DAD1 D, Sig=230,8 Ref=360,100

| Peak # | RetTime [min] | Type | Width [min] | Area [mAU*s] | Height [mAU] | Area %  |
|--------|---------------|------|-------------|--------------|--------------|---------|
| 1      | 12.305        | MM   | 0.3017      | 2.33084e4    | 1287.76392   | 82.0054 |
| 2      | 13.309        | MM   | 0.3041      | 5114.60107   | 280.33661    | 17.9946 |



## Entry 10

# Enantioenriched using (+)-neomenthol ( $\text{NaBH}_4$ as reductant)

```
=====
Acq. Operator   : General sequence           Seq. Line :    3
Acq. Instrument : Kev HPLC 1                 Location  : Vial 1
Injection Date  : 6/14/2010 11:01:52 AM      Inj       :    1
                                           Inj Volume: 5 µl

Acq. Method     : C:\Chem32\1\DATA\RUN QUEUE 2010-06-14 10-28-21\ISO_98_02_30MIN_1MLMIN.M
Last changed    : 6/14/2010 11:01:42 AM by General sequence
                  (modified after loading)
Analysis Method : C:\CHEM32\1\METHODS\03_QUICKSTART 1 MLMIN METHODS\ISO_98_02_30MIN_1MLMIN.M
Last changed    : 5/20/2010 11:50:38 AM by General sequence
Method Info     : Isocratic at 98/02 heptane/EtOH for 30min at 1ml/min
=====
```

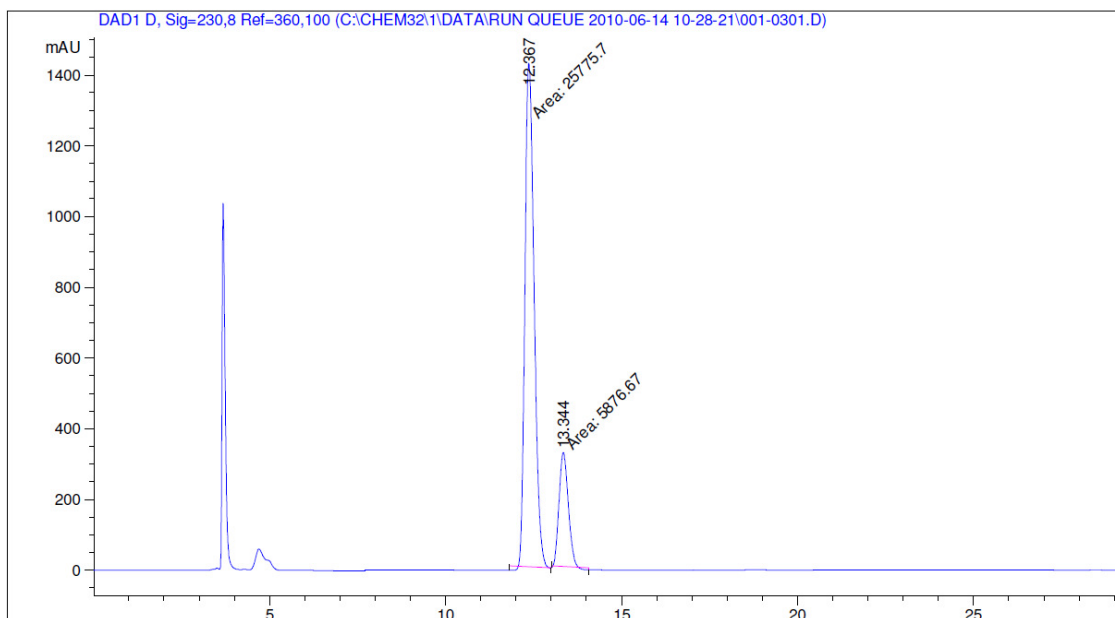

### Area Percent Report

```
=====
Sorted By      :      Signal
Multiplier     :      1.0000
Dilution       :      1.0000
Use Multiplier & Dilution Factor with ISTDs
=====
```

Signal 1: DAD1 D, Sig=230,8 Ref=360,100

| Peak # | RetTime [min] | Type | Width [min] | Area [mAU*s] | Height [mAU] | Area %  |
|--------|---------------|------|-------------|--------------|--------------|---------|
| 1      | 12.367        | MM   | 0.3019      | 2.57757e4    | 1422.85376   | 81.4337 |
| 2      | 13.344        | MM   | 0.3043      | 5876.67285   | 321.89029    | 18.5663 |

**Ar = 2-trifluoromethylphenyl**

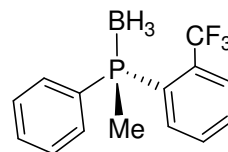

**Racemic**

```
=====
Acq. Operator   : General sequence          Seq. Line :    4
Acq. Instrument : Kev HPLC 1                Location  : Vial 72
Injection Date  : 5/14/2010 7:38:52 PM      Inj       :    1
                                           Inj Volume: 5 µl

Acq. Method     : C:\Chem32\1\DATA\RUN QUEUE 2010-04-21 18-10-30\RUN QUEUE 2010-05-14 18-23-
                  32\ISO_98_02_30MIN_1MLMIN.M
Last changed    : 5/14/2010 7:38:41 PM by General sequence
                  (modified after loading)
Analysis Method : C:\CHEM32\1\DATA\RUN QUEUE 2010-04-21 18-10-30\RUN QUEUE 2010-05-14 18-23-
                  32\072-0401.D\DA.M (ISO_98_02_30MIN_1MLMIN.M)
Last changed    : 5/15/2010 9:22:41 PM by General sequence
Method Info     : Isocratic at 98/02 heptane/EtOH for 30min at 1ml/min
=====
```

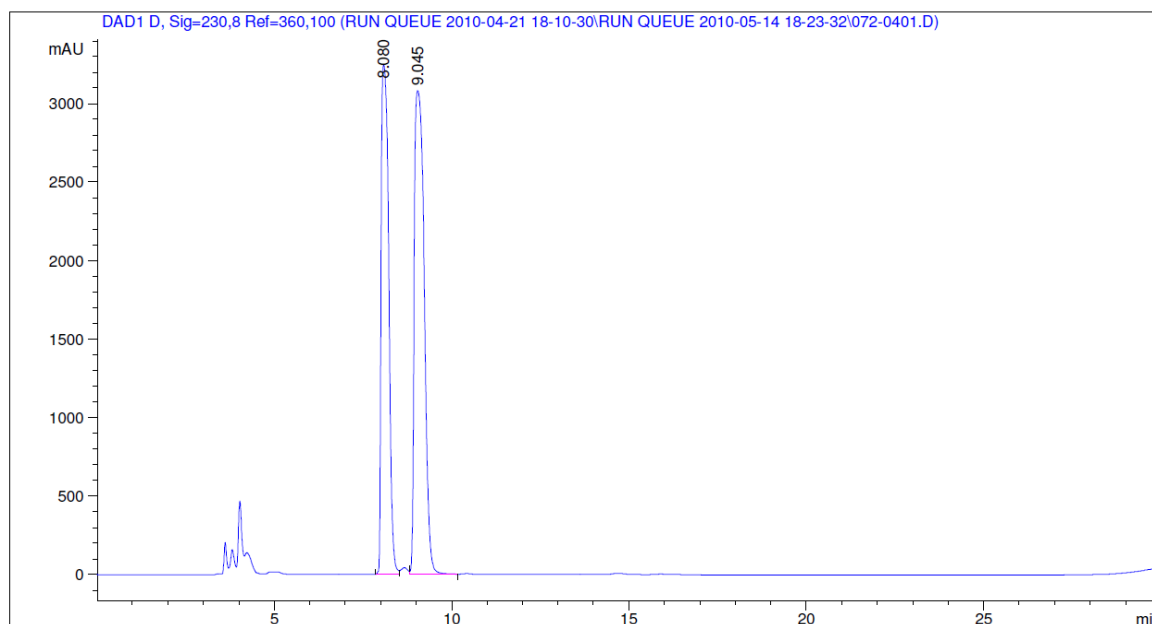

Area Percent Report

```
=====
Sorted By      :      Signal
Multiplier     :      1.0000
Dilution       :      1.0000
Use Multiplier & Dilution Factor with ISTDs
=====
```

Signal 1: DAD1 D, Sig=230,8 Ref=360,100

| Peak # | RetTime [min] | Type | Width [min] | Area [mAU*s] | Height [mAU] | Area %  |
|--------|---------------|------|-------------|--------------|--------------|---------|
| 1      | 8.080         | BV   | 0.2440      | 4.78741e4    | 3248.14136   | 44.3462 |
| 2      | 9.045         | VB   | 0.3193      | 6.00813e4    | 3084.19385   | 55.6538 |





# Entry 13

## Enantioenriched using (+)-isomenthol

```
=====
Acq. Operator   : General sequence                      Seq. Line :    6
Acq. Instrument : Kev HPLC 1                          Location  : Vial 12
Injection Date  : 7/3/2010 12:33:38 PM                 Inj       :    1
                                                    Inj Volume: 5 µl
Acq. Method     : C:\Chem32\1\DATA\RUN QUEUE 2010-07-03 10-47-28\ISO_98_02_30MIN_1MLMIN.M
Last changed    : 7/3/2010 12:33:27 PM by General sequence
                  (modified after loading)
Analysis Method : C:\CHEM32\1\METHODS\01_COLUMN METHODS\STABILISE_98_02_10MIN_1MLMIN.M
Last changed    : 7/3/2010 2:11:48 AM by General sequence
                  (modified after loading)
Method Info     : Stabilise column at 99/1 heptane/EtOH for 10min at 1ml/min
=====
```

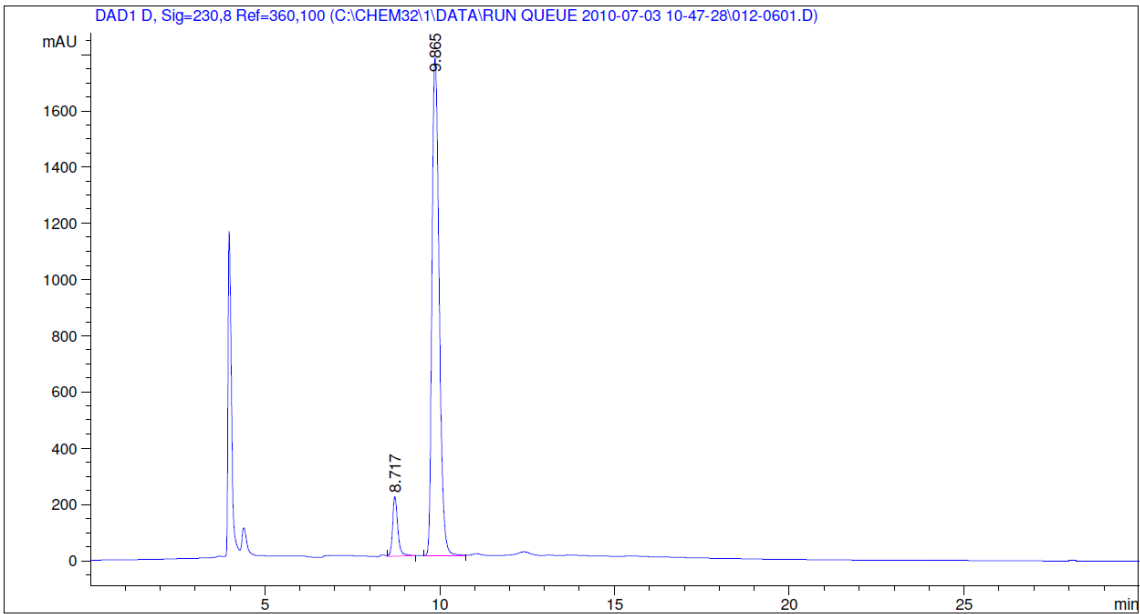

=====

Area Percent Report

=====

```
Sorted By      :      Signal
Multiplier     :      1.0000
Dilution       :      1.0000
Use Multiplier & Dilution Factor with ISTDs
```

Signal 1: DAD1 D, Sig=230,8 Ref=360,100

| Peak # | RetTime [min] | Type | Width [min] | Area [mAU*s] | Height [mAU] | Area %  |
|--------|---------------|------|-------------|--------------|--------------|---------|
| 1      | 8.717         | VB   | 0.1570      | 2204.11548   | 212.46716    | 8.0375  |
| 2      | 9.865         | BB   | 0.2221      | 2.52188e4    | 1771.23987   | 91.9625 |





**Ar = 2-isopropylphenyl**

**Racemic**

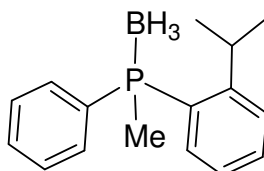

PMP1 , Solvent B : EtOH

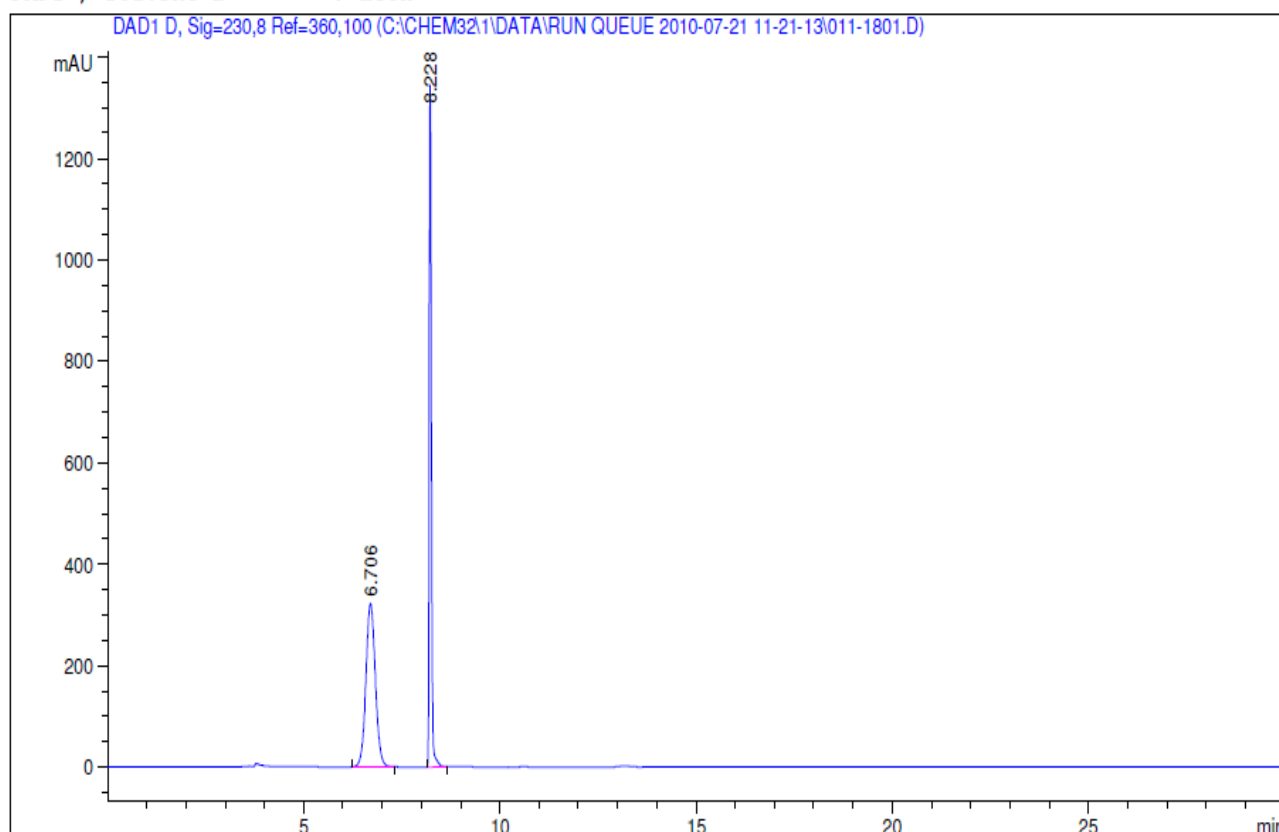

Signal 1: DAD1 D, Sig=230,8 Ref=360,100

| Peak # | RetTime [min] | Type | Width [min] | Area [mAU*s] | Height [mAU] | Area %  |
|--------|---------------|------|-------------|--------------|--------------|---------|
| 1      | 6.706         | BB   | 0.2578      | 5412.32080   | 322.45352    | 50.4836 |
| 2      | 8.228         | BB   | 0.0619      | 5308.62305   | 1348.78296   | 49.5164 |

Totals : 1.07209e4 1671.23648

DAD1 D, Sig=230,8 Ref=360,100 (C:\CHEM32\1\DATA\GG\RUN QUEUE 2010-11-26 16-53-56\PG-LM4-26.D)

Chromatogram plot showing mAU (milliabsorbance units) on the y-axis (0 to 1200) versus time on the x-axis (0 to 35 minutes). The plot displays two major peaks labeled with their retention times: 6.639 and 8.329. There are also smaller peaks around 24 and 28 minutes.

| Peak # | RetTime [min] | Type | Width [min] | Area [mAU*s] | Height [mAU] | Area %  |
|--------|---------------|------|-------------|--------------|--------------|---------|
| 1      | 6.639         | BB   | 0.2005      | 1.31445e4    | 967.59772    | 70.2318 |
| 2      | 8.329         | BB   | 0.0694      | 5571.37842   | 1218.07849   | 29.7682 |



Ar = 2-biphenyl

Racemic

=====

|                 |                                                                                                         |            |          |
|-----------------|---------------------------------------------------------------------------------------------------------|------------|----------|
| Acq. Operator   | : General sequence                                                                                      | Seq. Line  | : 6      |
| Acq. Instrument | : Kev HPLC 1                                                                                            | Location   | : Vial 2 |
| Injection Date  | : 6/2/2010 10:34:56 PM                                                                                  | Inj        | : 1      |
|                 |                                                                                                         | Inj Volume | : 5 µl   |
| Acq. Method     | : C:\Chem32\1\DATA\RUN QUEUE 2010-04-21 18-10-30\RUN QUEUE 2010-06-02 20-48-45\ISO_98_02_30MIN_1MLMIN.M |            |          |
| Last changed    | : 6/2/2010 10:34:46 PM by General sequence<br>(modified after loading)                                  |            |          |
| Analysis Method | : C:\CHEM32\1\METHODS\03_QUICKSTART 1 MLMIN METHODS\ISO_98_02_30MIN_1MLMIN.M                            |            |          |
| Last changed    | : 5/20/2010 11:50:38 AM by General sequence                                                             |            |          |
| Method Info     | : Isocratic at 98/02 heptane/EtOH for 30min at 1ml/min                                                  |            |          |

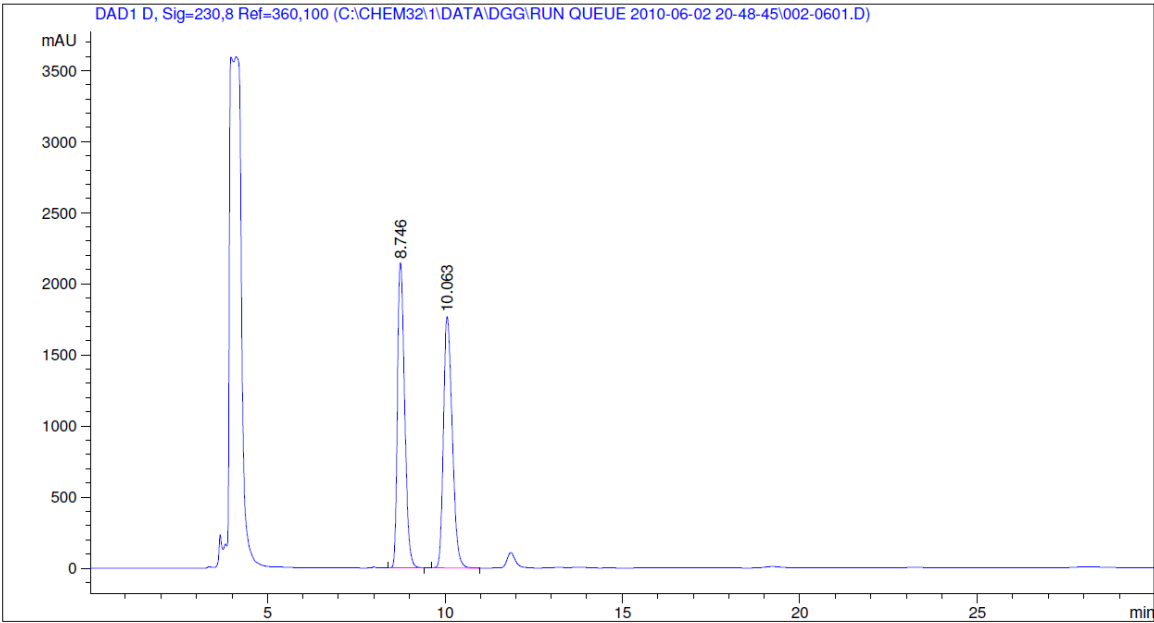

=====

Area Percent Report

=====

Sorted By : Signal  
Multiplier : 1.0000  
Dilution : 1.0000  
Use Multiplier & Dilution Factor with ISTDs

Signal 1: DAD1 D, Sig=230,8 Ref=360,100

| Peak # | RetTime [min] | Type | Width [min] | Area [mAU*s] | Height [mAU] | Area %  |
|--------|---------------|------|-------------|--------------|--------------|---------|
| 1      | 8.746         | VB   | 0.2174      | 3.00823e4    | 2148.21655   | 49.6276 |
| 2      | 10.063        | BB   | 0.2695      | 3.05337e4    | 1767.96008   | 50.3724 |



# Entry 18

## Enantioenriched using (+)-menthol (NaBH<sub>4</sub> as reductant)

```
=====
Acq. Operator   : General sequence          Seq. Line :    4
Acq. Instrument : Kev HPLC 1                Location  : Vial 12
Injection Date  : 7/4/2010 9:10:25 PM       Inj       :    1
                                           Inj Volume: 5 µl
Acq. Method     : C:\Chem32\1\DATA\RUN QUEUE 2010-07-04 19-56-15\ISO_98_02_30MIN_1MLMIN.M
Last changed    : 7/4/2010 9:10:12 PM by General sequence
                  (modified after loading)
Analysis Method : C:\CHEM32\1\METHODS\01_COLUMN METHODS\STABILISE_98_02_10MIN_1MLMIN.M
Last changed    : 7/3/2010 2:11:48 AM by General sequence
                  (modified after loading)
Method Info     : Stabilise column at 99/1 heptane/EtOH for 10min at 1ml/min
=====
```

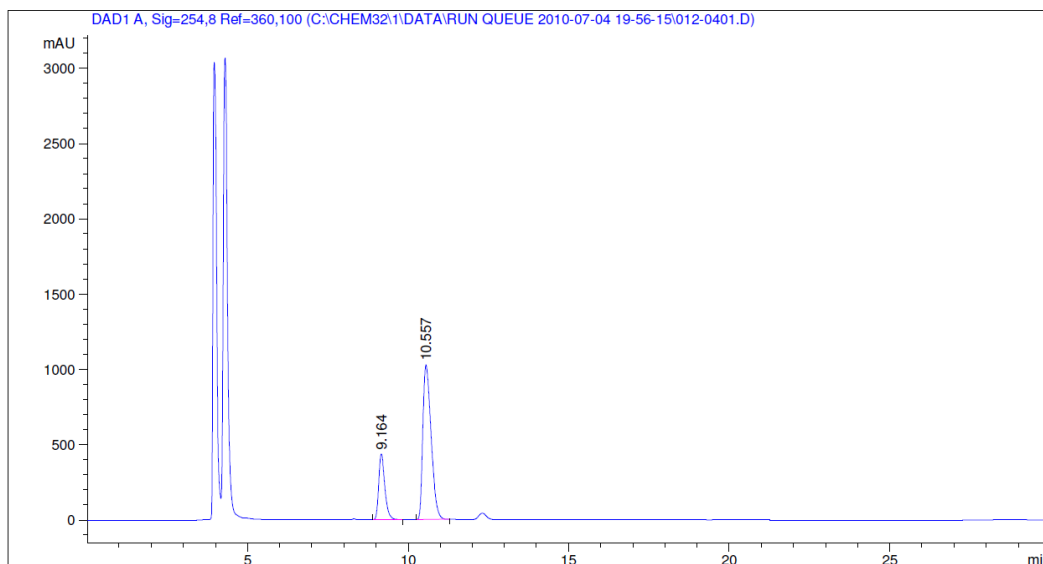

### Area Percent Report

```
Sorted By      : Signal
Multiplier     : 1.0000
Dilution       : 1.0000
Use Multiplier & Dilution Factor with ISTDs
```

Signal 1: DAD1 A, Sig=254,8 Ref=360,100

| Peak # | RetTime [min] | Type | Width [min] | Area [mAU*s] | Height [mAU] | Area %  |
|--------|---------------|------|-------------|--------------|--------------|---------|
| 1      | 9.164         | BB   | 0.2043      | 5782.34521   | 437.32153    | 23.8184 |
| 2      | 10.557        | BB   | 0.2817      | 1.84945e4    | 1029.13379   | 76.1816 |

**Ar = 4-fluoro-2-methylphenyl**

**Racemic**

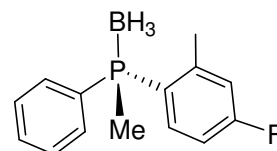

```
=====
Acq. Operator   : General sequence                      Seq. Line :    4
Acq. Instrument : Kev HPLC 1                            Location  : Vial 12
Injection Date  : 6/27/2010 7:23:21 PM                  Inj       :    1
                                                    Inj Volume: 5 µl
Acq. Method     : C:\Chem32\1\DATA\RUN QUEUE 2010-06-27 18-09-05\ISO_98_02_30MIN_1MLMIN.M
Last changed    : 6/27/2010 7:23:09 PM by General sequence
                  (modified after loading)
Analysis Method : C:\CHEM32\1\METHODS\03_QUICKSTART 1 MLMIN METHODS\ISO_98_02_30MIN_1MLMIN.M
Last changed    : 6/23/2010 10:22:59 AM by General sequence
                  (modified after loading)
Method Info     : Isocratic at 98/02 heptane/EtOH for 30min at 1ml/min
=====
```

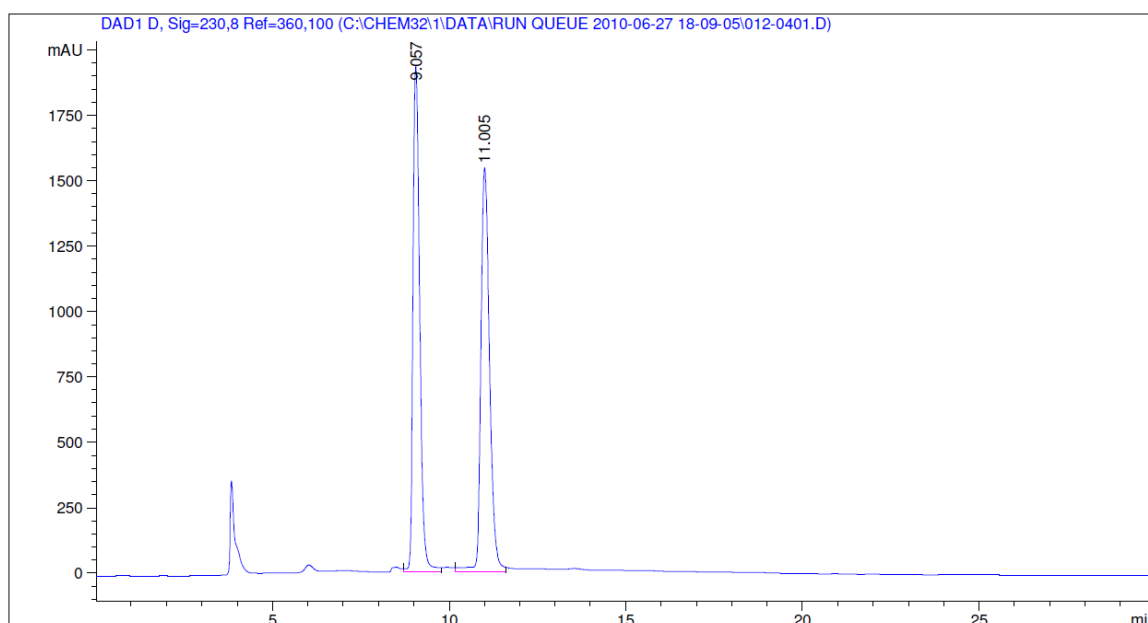

Area Percent Report

```
=====
Sorted By      :      Signal
Multiplier     :      1.0000
Dilution       :      1.0000
Use Multiplier & Dilution Factor with ISTDs
=====
```

Signal 1: DAD1 D, Sig=230,8 Ref=360,100

| Peak # | RetTime [min] | Type | Width [min] | Area [mAU*s] | Height [mAU] | Area %  |
|--------|---------------|------|-------------|--------------|--------------|---------|
| 1      | 9.057         | VB   | 0.2060      | 2.55190e4    | 1933.06165   | 49.0175 |
| 2      | 11.005        | VBA  | 0.2663      | 2.65420e4    | 1545.97217   | 50.9825 |



DAD1 D, Sig=230,8 Ref=360,100 (C:\CHEM32\1\DATA\RUN QUEUE 2010-07-01 21-00-43\091-0601.D)

The chromatogram displays three distinct peaks. The first peak is at a retention time of 3.395 minutes with a height of approximately 1800 mAU. The second peak is at 11.527 minutes with a height of approximately 450 mAU. The third peak is also at 11.527 minutes, with an area of 7071.1. The baseline is stable at approximately 25 mAU.

| Retention Time (min) | Height (mAU) | Area   |
|----------------------|--------------|--------|
| 3.395                | ~1800        | -      |
| 11.527               | ~450         | 7071.1 |

| Peak<br># | RetTime<br>[min] | Type | Width<br>[min] | Area<br>[mAU*s] | Height<br>[mAU] | Area<br>% |
|-----------|------------------|------|----------------|-----------------|-----------------|-----------|
| 1         | 9.395            | VB   | 0.2172         | 2.65441e4       | 1921.01575      | 78.9646   |
| 2         | 11.527           | MM   | 0.2599         | 7071.10059      | 453.36371       | 21.0354   |

## Supporting HPLC Traces Corresponding to Results in Table 1 Scalmeic **D**

|                      |             |
|----------------------|-------------|
| <b>Entry 1.....</b>  | <b>p.39</b> |
| <b>Entry 2.....</b>  | <b>p.40</b> |
| <b>Entry 6.....</b>  | <b>p.41</b> |
| <b>Entry 7.....</b>  | <b>p.42</b> |
| <b>Entry 8.....</b>  | <b>p.43</b> |
| <b>Entry 9.....</b>  | <b>p.44</b> |
| <b>Entry 10.....</b> | <b>p.45</b> |
| <b>Entry 11.....</b> | <b>p.46</b> |
| <b>Entry 12.....</b> | <b>p.47</b> |
| <b>Entry 15.....</b> | <b>p.48</b> |
| <b>Entry 16.....</b> | <b>p.49</b> |
| <b>Entry 17.....</b> | <b>p.50</b> |



# Entry 2

## Enantioenriched using (+)-menthol

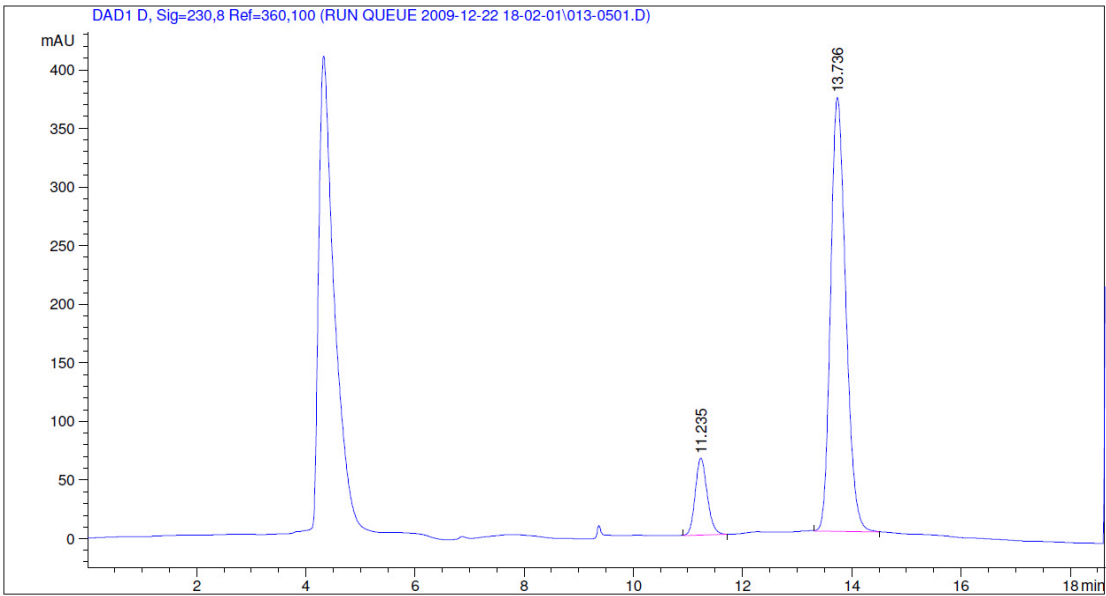

=====  
Area Percent Report  
=====

Sorted By : Signal  
Multiplier : 1.0000  
Dilution : 1.0000  
Use Multiplier & Dilution Factor with ISTDs

Signal 1: DAD1 D, Sig=230,8 Ref=360,100

| Peak # | RetTime [min] | Type | Width [min] | Area [mAU*s] | Height [mAU] | Area %  |
|--------|---------------|------|-------------|--------------|--------------|---------|
| 1      | 11.235        | BB   | 0.2358      | 999.67938    | 65.57795     | 12.2461 |
| 2      | 13.736        | BB   | 0.3017      | 7163.58252   | 370.36810    | 87.7539 |

## Entry 6

# Enantioenriched using (-)-menthol

```
=====
Acq. Operator   : KV                               Seq. Line :    3
Acq. Instrument : Kev HPLC 1                       Location  : Vial 11
Injection Date  : 2/21/2011 1:51:35 PM              Inj       :    1
                                                    Inj Volume: 5 µl
Acq. Method     : C:\Chem32\1\DATA\DGG\RUN QUEUE 2011-02-21 13-18-37\ISO_98_02_30MIN_1MLMIN.M
Last changed    : 2/21/2011 1:51:24 PM by KV
                  (modified after loading)
Analysis Method : C:\CHEM32\1\DATA\DGG\RUN QUEUE 2011-02-21 13-18-37\ISO_98_02_30MIN_1MLMIN.M
Last changed    : 2/21/2011 3:18:13 PM by KV
Method Info     : Isocratic at 98/02 heptane/EtOH for 30min at 1ml/min
=====
```

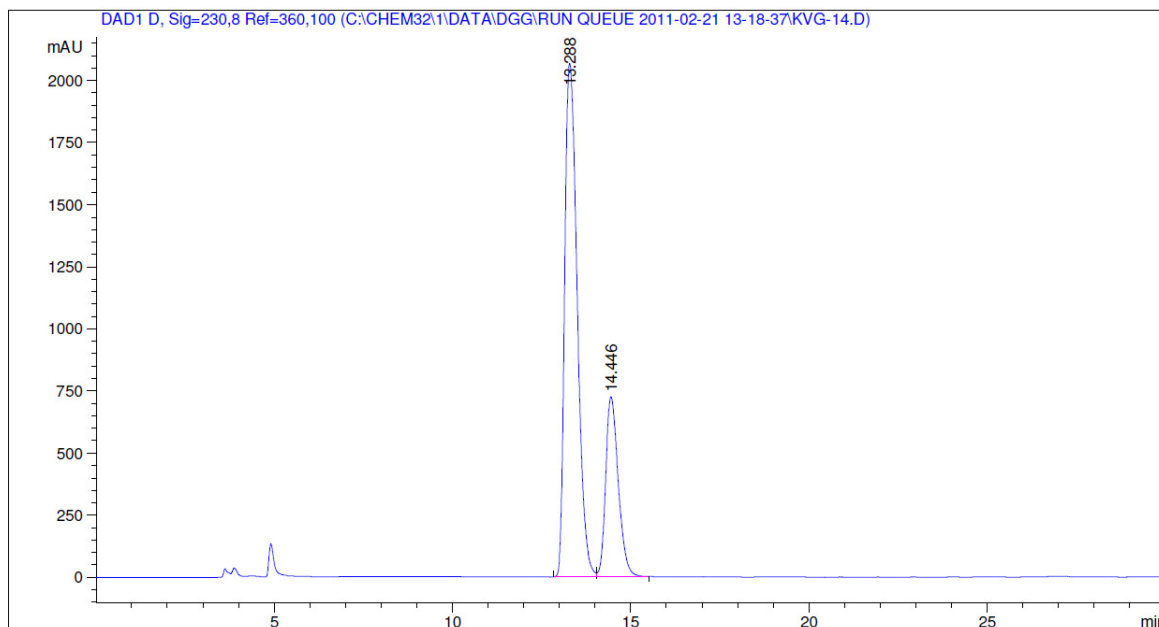

### Area Percent Report

```
=====
Sorted By      :      Signal
Multiplier     :      1.0000
Dilution       :      1.0000
Use Multiplier & Dilution Factor with ISTDs
=====
```

Signal 1: DAD1 D, Sig=230,8 Ref=360,100

| Peak # | RetTime [min] | Type | Width [min] | Area [mAU*s] | Height [mAU] | Area %  |
|--------|---------------|------|-------------|--------------|--------------|---------|
| 1      | 13.288        | BV   | 0.3843      | 5.04041e4    | 2068.42871   | 73.9150 |
| 2      | 14.446        | VB   | 0.3803      | 1.77879e4    | 724.90161    | 26.0850 |

# Entry 7

## Enantioenriched using (+)-menthol

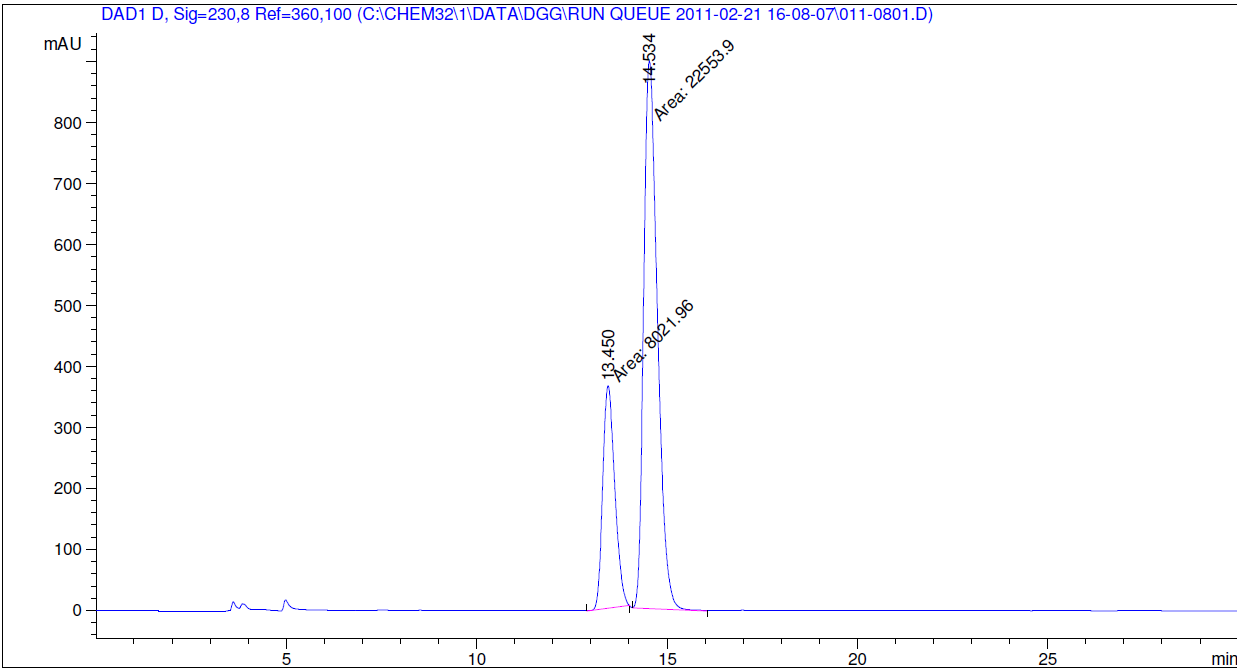

=====  
Area Percent Report  
=====

Sorted By : Signal  
Multiplier : 1.0000  
Dilution : 1.0000  
Use Multiplier & Dilution Factor with ISTDs

Signal 1: DAD1 D, Sig=230,8 Ref=360,100

| Peak # | RetTime [min] | Type | Width [min] | Area [mAU*s] | Height [mAU] | Area %  |
|--------|---------------|------|-------------|--------------|--------------|---------|
| 1      | 13.450        | MM   | 0.3663      | 8021.96191   | 364.98315    | 26.2363 |
| 2      | 14.534        | MM   | 0.4183      | 2.25539e4    | 898.59552    | 73.7637 |

# Entry 8

## Enantioenriched using (-)-8-phenylmenthol

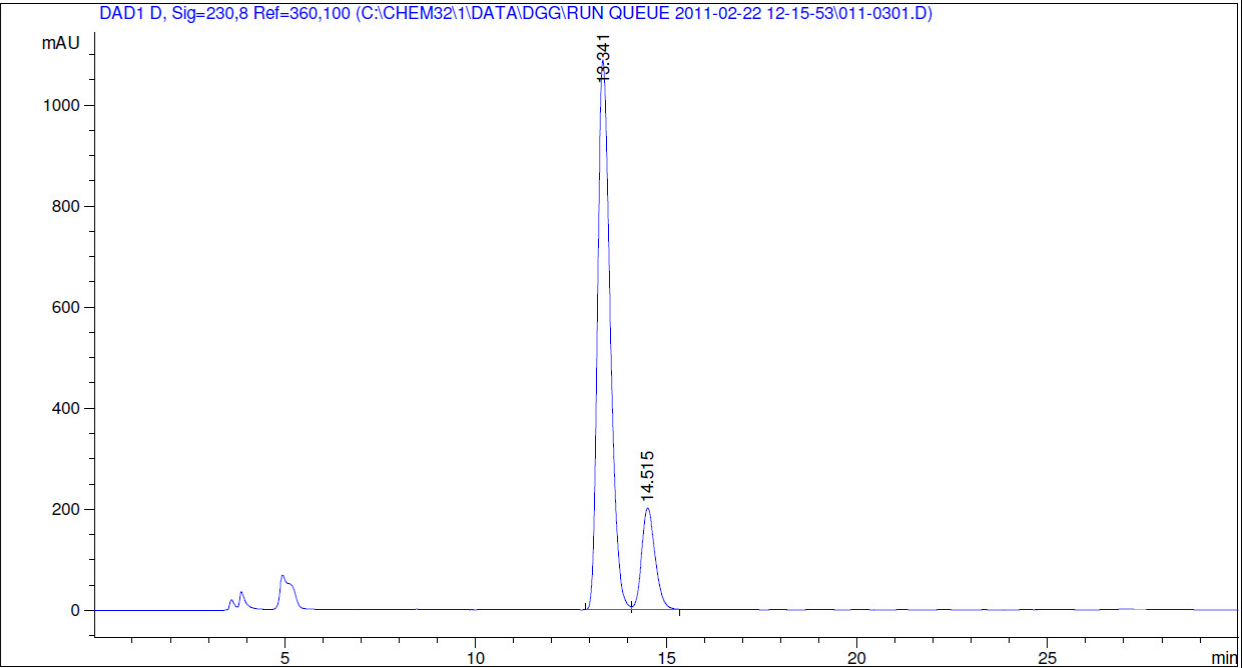

=====  
Area Percent Report  
=====

Sorted By : Signal  
Multiplier : 1.0000  
Dilution : 1.0000  
Use Multiplier & Dilution Factor with ISTDs

Signal 1: DAD1 D, Sig=230,8 Ref=360,100

| Peak # | RetTime [min] | Type | Width [min] | Area [mAU*s] | Height [mAU] | Area %  |
|--------|---------------|------|-------------|--------------|--------------|---------|
| 1      | 13.341        | BV   | 0.3565      | 2.50451e4    | 1088.05994   | 83.5931 |
| 2      | 14.515        | VB   | 0.3751      | 4915.63623   | 201.12798    | 16.4069 |

# Entry 9

## Enantioenriched using (+)-isomenthol

Method Info : Isocratic at 98/02 heptane/EtOH for 30min at 1ml/min

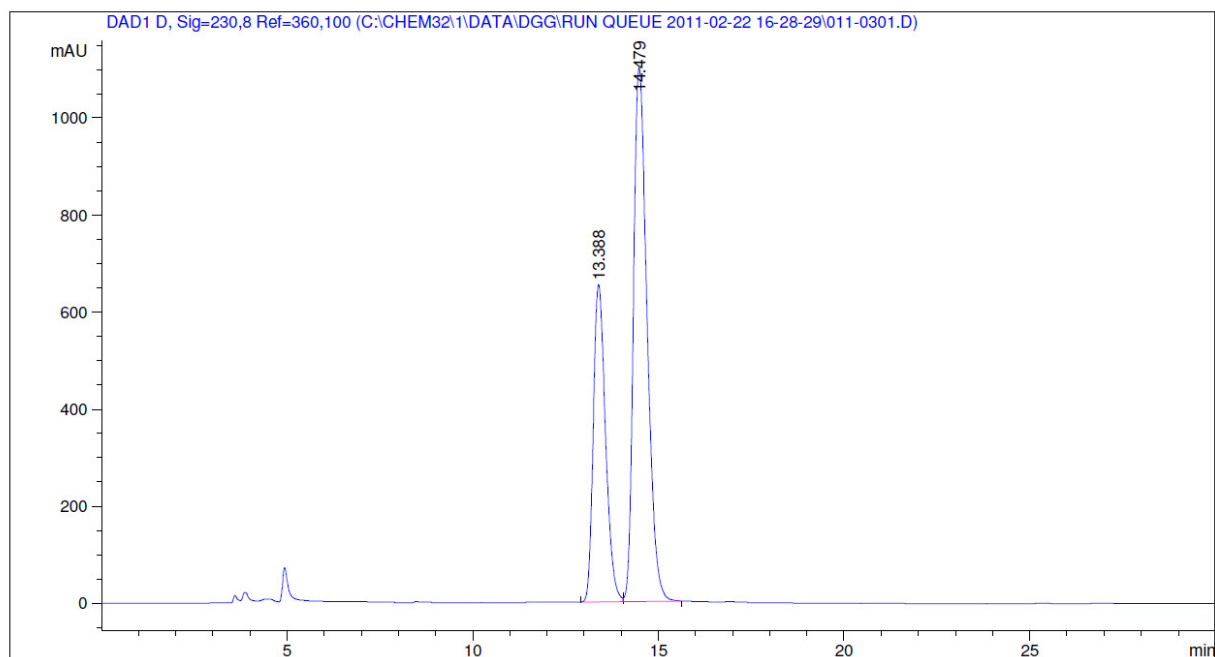

### Area Percent Report

Sorted By : Signal  
Multiplier : 1.0000  
Dilution : 1.0000  
Use Multiplier & Dilution Factor with ISTDs

Signal 1: DAD1 D, Sig=230,8 Ref=360,100

| Peak # | RetTime [min] | Type | Width [min] | Area [mAU*s] | Height [mAU] | Area %  |
|--------|---------------|------|-------------|--------------|--------------|---------|
| 1      | 13.388        | BV   | 0.3547      | 1.49509e4    | 654.08862    | 34.8429 |
| 2      | 14.479        | VB   | 0.3945      | 2.79586e4    | 1099.92725   | 65.1571 |





DAD1 D, Sig=230,8 Ref=360,100 (C:\CHEM32\1\DATA\RUN QUEUE 2010-12-07 18-26-41\011-0301.D)

The chromatogram displays three distinct peaks. The first peak is small and occurs at 4.503 minutes. The second peak is the largest, reaching a maximum of approximately 2000 mAU at 7.503 minutes. The third peak is medium-sized, reaching approximately 350 mAU at 9.641 minutes. The baseline is relatively flat with minor noise.

| Retention Time (min) | Approximate Height (mAU) |
|----------------------|--------------------------|
| 4.503                | 150                      |
| 7.503                | 2000                     |
| 9.641                | 350                      |

| Peak # | RetTime [min] | Type | Width [min] | Area [mAU*s] | Height [mAU] | Area %  |
|--------|---------------|------|-------------|--------------|--------------|---------|
| 1      | 7.503         | VV   | 0.2845      | 3.99992e4    | 2237.73389   | 78.9461 |
| 2      | 9.641         | VB   | 0.5063      | 1.06673e4    | 315.64572    | 21.0539 |



# Entry 15

## Enantioenriched using (-)-menthol (LiAlH<sub>4</sub> as reductant)

```
=====
Acq. Operator   : KV                               Seq. Line :   24
Acq. Instrument : Kev HPLC 1                       Location  : Vial 12
Injection Date  : 2/28/2011 9:29:41 PM              Inj       :    1
                                                    Inj Volume: 5 µl

Acq. Method     : C:\Chem32\1\DATA\DGG\RUN QUEUE 2011-02-28 11-53-58\ISO_98_02_30MIN_1MLMIN.M
Last changed    : 2/28/2011 9:29:30 PM by KV
                  (modified after loading)
Analysis Method : C:\CHEM32\1\DATA\DGG\RUN QUEUE 2011-02-28 11-53-58\ISO_98_02_30MIN_1MLMIN.M
Last changed    : 3/1/2011 9:03:17 AM by KV
Method Info     : Isocratic at 98/02 heptane/EtOH for 30min at 1ml/min
=====
```

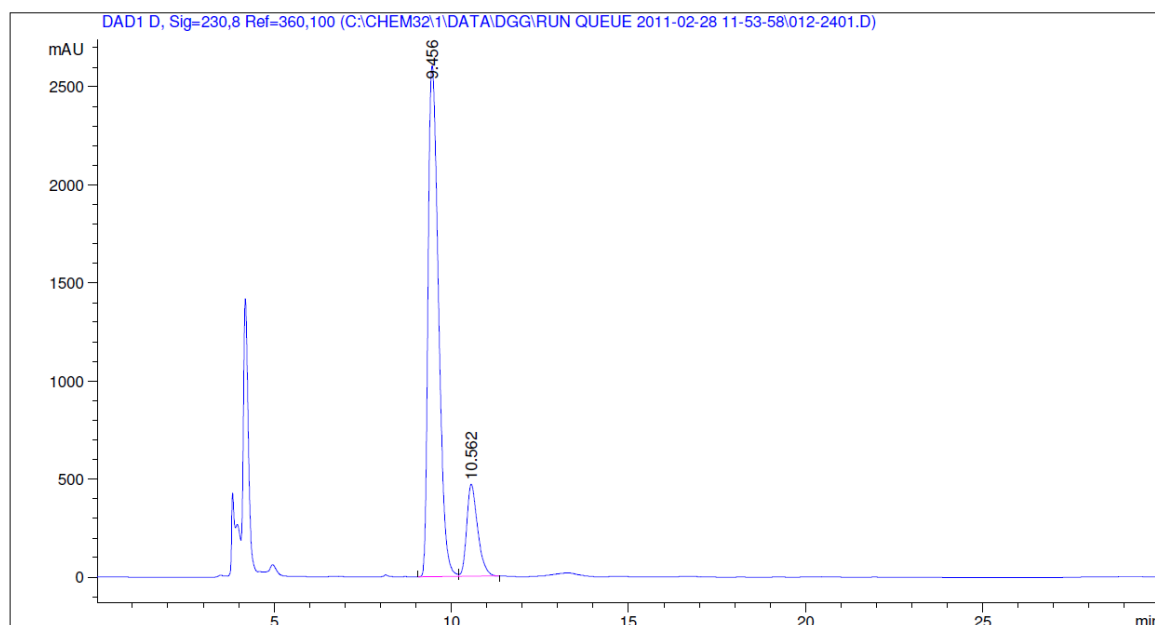

### Area Percent Report

```
=====
Sorted By      :      Signal
Multiplier     :      1.0000
Dilution       :      1.0000
Use Multiplier & Dilution Factor with ISTDs
=====
```

Signal 1: DAD1 D, Sig=230,8 Ref=360,100

| Peak # | RetTime [min] | Type | Width [min] | Area [mAU*s] | Height [mAU] | Area %  |
|--------|---------------|------|-------------|--------------|--------------|---------|
| 1      | 9.456         | BV   | 0.3188      | 5.28854e4    | 2605.26904   | 83.9893 |
| 2      | 10.562        | VB   | 0.3264      | 1.00815e4    | 469.67587    | 16.0107 |





## References

- [1] L. M. Harwood, C. J. Moody, J. M. Percy, *Experimental Organic Chemistry*, 2<sup>nd</sup> ed. 1999, Blackwell Science Ltd. Oxford.
- [2] E. Bergin, C. T. O'Connor, S. B. Robinson, E. M. McGarrigle, C. P. O'Mahony, D. G. Gilheany, *J. Am. Chem. Soc.* **2007**, *129*, 9566.
- [3] K. V. Rajendran, L. Kennedy, D. G. Gilheany, *Eur.J. Org. Chem.* **2010**, 5642.
- [4] Y. Wada, T. Imamoto, H. Tsuruta, K. Yamaguchi, I. D. Gridnev, *Adv. Synth. Catal.* **2004**, *346*, 777.
- [5] E. B. Kaloun, R. Merdés, J.-P. Genet, J. Uziel, S. Jugé, *Journal of Organometallic Chemistry* **1997**, *529*, 455.
- [6] C. Bauduin, D. Moulin, E. B. Kaloun, C. Darcel, S. Jugé, *J. Org. Chem.* **2003**, *68*, 4293.
- [7] M. Al-Masum, G. Kumaraswamy, T. Livinghouse, *J. Org. Chem.* **2000**, *65*, 4776.
